# Supplementary material for: Patient safety regulation in the NHS: mapping the regulatory landscape of healthcare
Source: PubMed Central journal article supplement — BMJ Open. 2019 Jul 9;9(7):e028663. doi: 10.1136/bmjopen-2018-028663 (PMC6615819; doi:10.1136/bmjopen-2018-028663), 2019-07-09
Supplement: bmjopen-2018-028663.draft_revisions.pdf [file bmjopen-2018-028663.draft_revisions.pdf]

# BMJ Open

BMJ Open is committed to open peer review. As part of this commitment we make the peer review history of every article we publish publicly available.

When an article is published we post the peer reviewers' comments and the authors' responses online. We also post the versions of the paper that were used during peer review. These are the versions that the peer review comments apply to.

The versions of the paper that follow are the versions that were submitted during the peer review process. They are not the versions of record or the final published versions. They should not be cited or distributed as the published version of this manuscript.

BMJ Open is an open access journal and the full, final, typeset and author-corrected version of record of the manuscript is available on our site with no access controls, subscription charges or pay-per-view fees (<http://bmjopen.bmj.com>).

If you have any questions on BMJ Open's open peer review process please email [info.bmjopen@bmj.com](mailto:info.bmjopen@bmj.com)

# BMJ Open

## Patient safety regulation in the NHS: Mapping the regulatory landscape of healthcare.

|                               |                                                                                                                                                                                                                                              |
|-------------------------------|----------------------------------------------------------------------------------------------------------------------------------------------------------------------------------------------------------------------------------------------|
| Journal:                      | <i>BMJ Open</i>                                                                                                                                                                                                                              |
| Manuscript ID                 | bmjopen-2018-028663                                                                                                                                                                                                                          |
| Article Type:                 | Research                                                                                                                                                                                                                                     |
| Date Submitted by the Author: | 14-Jan-2019                                                                                                                                                                                                                                  |
| Complete List of Authors:     | Oikonomou, Eirini; University of Oxford, Experimental Psychology<br>Carthey, Jane; Jane Carthey Consulting<br>Macrae, Carl; University of Oxford, Experimental Psychology<br>Vincent, Charles; University of Oxford, Experimental Psychology |
| Keywords:                     | health care, regulation, patient safety, mapping, statutory regulators, regulatory functions                                                                                                                                                 |
|                               |                                                                                                                                                                                                                                              |

SCHOLARONE™  
Manuscripts

1  
2  
3 **Patient safety regulation in the NHS: Mapping the regulatory landscape of healthcare.**  
4  
5

6  
7 Authors:

8  
9  
10 Eirini Oikonomou<sup>1</sup>, Jane Carthey<sup>2</sup>, Carl Macrae<sup>1</sup>, Charles Vincent<sup>1</sup>  
11  
12

13 Author affiliations:

- 14  
15  
16 1. Department of Experimental Psychology, University of Oxford, Oxford, UK  
17 [Eirini.oikonomou@psy.ox.ac.uk](mailto:Eirini.oikonomou@psy.ox.ac.uk) [Charles.vincent@psy.ox.ac.uk](mailto:Charles.vincent@psy.ox.ac.uk) [Carl.macrae@psy.ox.ac.uk](mailto:Carl.macrae@psy.ox.ac.uk)  
18  
19  
20 2. Jane Carthey Consulting, London, UK [Jane@janecarthey.com](mailto:Jane@janecarthey.com)  
21  
22

23  
24 Correspondence to:

25  
26  
27 Eirini Oikonomou  
28

29  
30 Email: [Eirini.oikonomou@psy.ox.ac.uk](mailto:Eirini.oikonomou@psy.ox.ac.uk)  
31  
32

33  
34 Tel: + 44 (0) 7849462856  
35  
36

37 Word count: 4230  
38  
39

40 Keywords: health care, regulation, patient safety, mapping, statutory regulators, regulatory functions  
41  
42  
43  
44  
45  
46  
47  
48  
49  
50  
51  
52  
53  
54  
55  
56  
57  
58  
59  
60

## ABSTRACT

**Objectives:** The current research project sought to map out the regulatory landscape for patient safety in the NHS.

**Method:** We used a systematic desk-based search using a variety of sources to identify the total number of organisations with regulatory influence in the NHS; we researched publicly available documents listing external inspection agencies, participated in advisory consultations with NHS regulatory compliance teams and reviewed the websites of all regulatory agencies.

**Results:** Our mapping revealed over 127 organisations who exert some regulatory influence on NHS provider organisations in addition to 211 Clinical Commissioning Groups. The majority of these organisations set standards and collect data from provider organisations and a considerable number carry out investigations. There is a multitude of overlapping functions and activities. The variability in approach and overlapping functions suggest that there is no overall integrated regulatory approach.

**Conclusion:** Regulation potentially provides a variety of benefits in terms of maintaining the safety and quality of care by providing an external perspective on the care being delivered. However, the variability, extent and fragmentation of the regulatory system of the NHS make it hard for regulators to act effectively and places a massive burden on NHS provider organisations. Continual regulatory requests and visits distract and impede locally driven initiatives to improve safety and quality and the overall effect may actually be detrimental to patient safety. Further research is needed to understand the full extent of regulatory activity and the true benefits and costs incurred.

## ARTICLE SUMMARY

### Strengths and limitations the study

- This is the first study to attempt a complete mapping of all organisations engaged in regulatory activities in the NHS.
- We define organisations with regulatory influence as any that carry out regulatory activities in the NHS. This includes all statutory regulators but many others who may not see themselves as regulators but nevertheless carry out regulatory activities.
- Due to resource constraints, we were only able to identify regulatory activities from the websites of the relevant organisations.
- Although we have searched extensively we cannot be sure that this is a complete mapping. Even NHS provider organisations did not know exactly how many external organisations seek to influence their activities through regulatory activity.

1  
2  
3 • **Funding**  
4  
5

6 This work was supported by The Health Foundation (90 Long Acre, London, WC2E 9RA)  
7  
8

9  
10 Email: [info@health.org.uk](mailto:info@health.org.uk). Grant number: 7531.  
11  
12

13 • **Competing interests**  
14

15 The authors declare that they have no competing interests.  
16  
17  
18  
19  
20  
21  
22  
23  
24  
25  
26  
27  
28  
29  
30  
31  
32  
33  
34  
35  
36  
37  
38  
39  
40  
41  
42  
43  
44  
45  
46  
47  
48  
49  
50  
51  
52  
53  
54  
55  
56  
57  
58  
59  
60

For peer review only

## INTRODUCTION

The purpose of patient safety regulation is to ensure safe, reliable treatment for patients and a safe working environment for healthcare professionals. Regulation potentially provides potentially valuable feedback to provider organisations, supporting improvement and ensuring that high standards of performance are maintained (1). Critics argue that regulation is often ineffective (2), inflexible (3) and generates ticking box behaviour and bureaucratic compliance (4).

A number of organisations and commentators have called for reform of the regulatory system. However, before such changes can be given proper consideration a fundamental question must be addressed. What is the nature and extent of the current system?

### Evolution of regulation in the NHS

The 1944 National Health Service White Paper recognised that regular inspections of hospitals would be valuable but the first true external oversight body was not established until 1969, following a series of healthcare scandals standards (5). Until the late 1970s, the Department of Health fulfilled most of the regulatory functions, but between 1979 and 1997, the Conservative administration created a number of regulatory bodies (such as the NHS Litigation Authority, now NHS Resolution). However, broad sectors of the NHS remained free of external oversight or regulation throughout this period (6).

Several high-profile failures of care in the 1990s (including the problems at the Bristol Royal Infirmary, Royal Liverpool Children's Hospital) eroded public trust in the NHS. The Labour Government adopted a more interventionist approach to regulation, increasing the depth, detail and complexity of inspection processes (5). The National Institute for Clinical Excellence (NICE) was established in 1999 and the Commission for Health Improvement (CHI), the ancestor of the Care Quality Commission, was founded in 2001 to oversee and inspect the clinical quality of all NHS services.

1  
2  
3 The 2013 Francis report on the Mid Staffordshire failings of care was a defining moment for the whole regulatory  
4 regime which had failed to detect and respond to early signs of organisational failure (7). The governmental  
5 response generated more structural changes to the system, with an increased focus on devolution of central  
6 oversight.  
7  
8  
9

### 10 11 12 **The complexity of NHS Regulation**

13  
14  
15 This short overview of regulation history in the UK demonstrates a stream of structural reforms over the past 25  
16 years, which have gradually increased the extent and complexity of the regulatory structures. (7,8). In 2002  
17 Walshe argued that: 'Current regulators vary widely in their statutory authority, powers, scope of action, and  
18 approach. The resulting mosaic of regulatory arrangements is highly fragmented and some roles are duplicated'  
19 (9). Since then, the complexity of the system has increased considerably. A report from the NHS Confederation  
20 argued that this complexity places an unnecessary burden on healthcare organisations when, for example,  
21 different regulators request evidence for similar safety standards (10). The Professional Standards Authority has  
22 pointed out that all the nine bodies they oversee have a common set of functions yet there are differences in  
23 legislation, standards, approach, efficiency, amongst others (11). This complex system has evolved rather than  
24 been designed and is not fully understood even by professional regulators; it is almost impossible for the general  
25 public to navigate the system.  
26  
27  
28  
29  
30  
31  
32  
33  
34  
35  
36  
37  
38  
39  
40

### 41 **The need to map the regulatory landscape of the NHS**

42  
43  
44 We aimed to map the landscape of patient safety regulation in the NHS and understand the totality of influences  
45 on NHS Trusts. This is an essential preliminary to any rational reform of the regulatory system but has never, to  
46 our knowledge, been previously attempted. This means identifying all organisations which exert regulatory  
47 influence, not just those designated as statutory regulators. In our preliminary inquiries it appeared that no one,  
48 not even regulatory organisations, had a complete understanding of all the bodies with regulatory impact on the  
49 NHS. In this study we attempted to map the complete landscape of all organisations with patient safety regulatory  
50 effect on NHS providers and consider the impact of this system on NHS provider organisations.  
51  
52  
53  
54  
55  
56  
57  
58  
59  
60



## METHODOLOGY

### Defining safety regulation

We intended to examine all organisations that had regulatory impact on healthcare organisations. This of course includes agencies with statutory responsibilities, but many other organisations exert regulatory influence through standard setting, analysis and feedback of data, inspection and other activities. To capture this wider landscape we defined organisations with regulatory impact as those who fulfilled all of the following four criteria:

- Consider the improvement of patient safety a part of their organisational responsibilities.
- Undertake some form of monitoring or oversight of safety related standards or performance.
- Engage in formal attempts to influence the safety performance of NHS provider organisations (there are a variety of ways this can be achieved in practice).
- Derive some form of legitimacy or external authority for their work on safety.

### Mapping process

We used a variety of sources to gradually build up a picture of the patient safety regulatory landscape of the NHS. Firstly, we identified publicly available documents listing external inspection agencies for five NHS Trusts- two community, two acute and one mental health. These lists summarise regulatory visits, inspections, assessments and accreditations made by regulatory bodies. This exercise provided an initial list of regulatory agencies. The Trusts themselves admitted that they were not sure of how many agencies were visiting them or requiring information. Advisory consultations with members of Trusts' regulatory compliance teams, complemented the final list of agencies involved in overseeing healthcare providers.

We then scanned the official websites of all statutory regulatory agencies. We also searched for existing collaborations and partnerships with other institutions which increased the number of organisations detected.

1  
2  
3 The review eventually evaluated over 200 organisations in some way involved in overseeing healthcare together  
4 with over 200 Clinical Commissioning Groups. We then refined this list to include only those organisations meeting  
5 the four inclusion criteria set out above. We then classified all these organisations under three broad categories  
6 according to their core aim (i) statutory regulators of services, such as the Care Quality Commission; (ii) statutory  
7 regulators of professionals, such as the General Medical Council and (iii) organisations with regulatory influence  
8 and effect (such as Royal Colleges and standard setting organisations) (Figure 1). In case organisations fell under  
9 more than one cluster, a decision was reached through discussions among members of the research group.

10  
11  
12  
13  
14  
15  
16  
17  
18  
19 -FIGURE 1 INSERT HERE-

### 20 21 22 **Describing regulatory activities of organisations**

23  
24  
25 To gain a more in-depth understanding of the patient safety related activities these organisations carry out, we  
26 documented how they monitor professional performance, the way they evaluate compliance with standards and  
27 what actions are involved in approaching perceived deficiencies (e.g. enforcement sanctions, public ratings, legal  
28 prosecution etc.).

29  
30  
31  
32  
33  
34  
35 We reviewed a variety of sources; official websites, statutory instruments, reports, and other records (e.g.  
36 information enfolded in various electronic domains such as; annual reviews, strategic plans, meeting minutes etc.)  
37 and identified a list of external oversight functions. We then simplified the list by removing duplicates and linking  
38 activities which were essentially similar but described in different ways by different organisations. We additionally  
39 consulted a small advisory group of healthcare regulation experts, both practitioners and researchers, to reach  
40 consensus on classifying the activities into a more concise list. Based upon consensus among the authors, all  
41 regulators and regulatory actors carry out 15 overseeing functions (Figure 2).

42  
43  
44  
45  
46  
47  
48  
49  
50  
51 -FIGURE 2 INSERTED HERE-

### 52 53 54 **Ethical approval**

55  
56  
57 Ethical approval was given for this study by the University of Oxford Clinical Trials and Research Governance  
58 (CTRG) team with REC reference number: R30976/RE001.  
59  
60

1  
2  
3 **Patient involvement**  
4

5  
6 A small advisory group with patient representatives supported the design of the project. Preliminary findings were  
7  
8 presented to a larger seminar at the Health Foundation with a number of patient representatives present.  
9

10  
11  
12  
13  
14  
15  
16  
17  
18  
19  
20  
21  
22  
23  
24  
25  
26  
27  
28  
29  
30  
31  
32  
33  
34  
35  
36  
37  
38  
39  
40  
41  
42  
43  
44  
45  
46  
47  
48  
49  
50  
51  
52  
53  
54  
55  
56  
57  
58  
59  
60

For peer review only

## RESULTS

Our mapping revealed that over 127 organisations exert some safety regulatory effect on NHS provider organisations in addition to 211 Clinical Commissioning Groups (Figure 3). We emphasise that many of these organisations would not see themselves as regulators and indeed regulation is usually not their primary function. They do all nevertheless exert some regulatory influence on the NHS. The extent of their influence and activity varies widely and only a proportion of these organisations may be in contact with any one NHS Trust. A full list of organisations identified is presented in Appendix Figure 1 in the Appendix.

-FIGURE 3 INSERTED HERE-

### Oversight of the system

Three national bodies that fund, lead and support healthcare in England; Department of Health, NHS England and Public Health England (PHE).

The Department of Health is a ministerial department responsible for overseeing the system and is supported by 28 arm's length bodies (12). NHS England oversees the operation of 211 Clinical Commissioning Groups (CCGs) and directly commission specialist services and primary care including GPs, pharmacists, dental practices, military and a number of local health services. Its main role is to set the priorities and direction of the NHS and to improve health and care outcomes for people in England. Public Health England (PHE) is an executive agency of the Department of Health with operational autonomy. PHE works with local government, Parliament, industry and national bodies to support public health services such as immunisation and screening programmes.

### Clinical Commissioning Groups

Clinical Commissioning Groups (CCGs) are independent, NHS statutory bodies responsible for the planning and commissioning of health care services within their local area. Each NHS provider organisation will work with only a limited number of CCGs, which may vary in their remit and functions.

1  
2  
3 The majority of health services, including emergency care, elective hospital care, maternity services, community  
4 and mental health services and general practices are commissioned by the CCGs (13). Currently, there are 211  
5  
6 clinical commissioning groups in England, responsible for 2/3 of the total NHS England budget. CCGs operate as a  
7  
8 strong influencer for improving patient safety at provider level through their role in securing public involvement  
9  
10 and seeking assurance providers are meeting safety standards.  
11  
12  
13  
14  
15  
16  
17  
18  
19  
20  
21  
22  
23  
24  
25  
26  
27  
28  
29  
30  
31  
32  
33  
34  
35  
36  
37  
38  
39  
40  
41  
42  
43  
44  
45  
46  
47  
48  
49  
50  
51  
52  
53  
54  
55  
56  
57  
58  
59  
60

For peer review only

## STATUTORY REGULATORS

Statutory regulators operate with a mandate to oversee organisations, services, professionals and healthcare products. They often develop quality standards, offer accreditation services and support professionals through education and training. The full list of statutory regulators are presented in Table 1.

Table 1. *Statutory regulators of the NHS.*

| <b>Services Regulators: 10</b>               | <b>Professionals Regulators: 8</b>         |
|----------------------------------------------|--------------------------------------------|
| Care Quality Commission (CQC)                | General Medical Council (GMC)              |
| NHS Improvement                              | General Dental Council (GDC)               |
| United Kingdom Accreditation Service (UKAS)  | General Chiropractic Council (GCC)         |
| Human Fertilisation and Embryology Authority | General Optical Council (GOC)              |
| Health and Safety Executive (HSE)            | General Osteopathic Council (GOsC)         |
| Environment Agency (EA)                      | General Pharmaceutical Council (GPhC)      |
| NHS Litigation Resolution                    | Health and Care Professions Council (HCPC) |
| The Coroners' Society of England and Wales   | Nursing and Midwifery Council (NMC)        |
| Human Tissue Authority (HTA)                 |                                            |

---

Medicines and Healthcare Products

Regulatory Agency (MHRA)

---

### Regulators of services

Ten statutory bodies overseeing health care systems and clinical settings such as hospitals, care homes and general practices. Their scope of functions includes providing standards and guidelines as well as monitoring healthcare providers' safety performance to establish compliance with policies and quality standards. They have statutory powers to impose enforcing measures which span from suspension or removal from the registry in case of non-compliance to criminal prosecution and penalties.

The Care Quality Commission (CQC) is the primary healthcare regulator in England. It is an independent agency, established in 2009 and is responsible for registering, inspecting, monitoring and rating services of health care providers in England. Its central role includes investigating, licencing, supporting healthcare providers by introducing quality improvement strategies and collecting clinical data and performance metrics that could reveal problems within services.

NHS Improvement, (NHSI) a non-departmental agency monitoring financial and operational functions across the health sector. NHSI works closely with CQC in holding NHS boards to account and providing specialised support to providers under-or at risk of being under- special measures, stabilising and improving their performance (14)

Other organisations of this cohort are involved in assessing, accrediting and licencing health care services. For example, the Human Fertilisation and Embryology Authority (HFEA) is the statutory body that regulates and inspects all in vitro fertilisation (IVF) healthcare settings, assessing compliance and publishing policy papers (15).

The Health and Safety Executive, a body responsible for regulating workplace health and safety and NHS Resolution (Former NHS Litigation Authority) managing complaints and negligence against the NHS (16). Equally, the Environment Agency (EA) is accountable for medical waste regulation (17) and Coroners and Medicines and

1  
2  
3 Healthcare products Regulatory Agency are both involved in serious incidents investigations making inquiries into  
4  
5 healthcare providers and enforcing sanctions (18,19)  
6  
7

### 8 **Regulators of professionals**

9  
10  
11 Eight statutory bodies oversee the practice of health care professionals. Professional regulators have multiple  
12  
13 responsibilities in addition to strictly regulatory activities. They also seek to improve education and training,  
14  
15 provide support to health professionals throughout their professional career, from mentoring during training, to  
16  
17 emotional support services during investigations. Regulatory functions include registering or professionals,  
18  
19 revalidation, training and imposing sanctions where necessary.  
20  
21  
22

23  
24 The Professionals Standards Authority (PSA) oversees the above eight regulators. PSA is an independent body,  
25  
26 accountable to the Parliament and it sets standards for those organisations that maintain voluntary registers and  
27  
28 accredits those that meet them (20). Although their scope of action includes monitoring regulators' performance,  
29  
30 conducting audits, reviewing decisions regarding fitness to practice and reporting to the Parliament, they do not  
31  
32 identify themselves as a regulator. PSA can apply conditions and suspend or remove accreditation from healthcare  
33  
34 professionals but does not have the statutory power to investigate complaints about the regulators they oversee  
35  
36  
37 (19).  
38  
39

### 40 **Organisations with regulatory influence**

41  
42 We found 109 other organisations that critically seek to influence the safety performance of NHs provider  
43  
44 organisations. These organisations do not, for the most part, see themselves as regulators. However, all of these  
45  
46 organisations meet the four criteria set out above, being concerned with patient safety, seeking to influence  
47  
48 standards and deriving some form of external legitimacy. They therefore exert regulatory influence on provider  
49  
50 organisations.  
51  
52

53  
54 While they do not see themselves as regulators, these organisations nevertheless carry out some regulatory  
55  
56 activities (Table 2) and have a significant impact on the provider organisations. The group comprises national  
57  
58  
59  
60



1  
2  
3 agencies (e.g. National Institute for Health and Clinical Excellence (NICE), professional bodies (e.g. Royal College  
4 of Physicians), patient organisations and charities exerting regulatory effects through norm-setting and support  
5  
6 (e.g. Healthwatch England, Action Against Medical Accidents). Table 2, summarises the institutions with  
7  
8 regulatory effect.  
9  
10

11  
12  
13 The majority of these organisations set standards of some kind with which they seek to influence provider  
14  
15 organisations. Most collect data from provider organisations and a considerable number carry out investigations  
16  
17 of some kind when circumstances require. A few can use sanctions such as the withdrawal of accreditation for  
18  
19 training. Table 2 provides a summary of the various regulatory activities of each category of the influencing  
20  
21 organisations.  
22  
23  
24  
25  
26  
27  
28  
29  
30  
31  
32  
33  
34  
35  
36  
37  
38  
39  
40  
41  
42  
43  
44  
45  
46  
47  
48  
49  
50  
51  
52  
53  
54  
55  
56  
57  
58  
59  
60

Table 2. *Organisations with regulatory influence*

| Categories                                       | Number of organisations |                                                                                                                                                              |
|--------------------------------------------------|-------------------------|--------------------------------------------------------------------------------------------------------------------------------------------------------------|
| Information and standards                        | 11                      | Operate with a mandate to develop national standards and recommendations through evidence-based research, in collaboration with health care experts' teams.  |
| Professional Peer Review and Quality Improvement | 13                      | Health professional networks, aiming to promote collaboration between health care                                                                            |
| National advisory Groups                         | 21                      | Engaged in improving quality of care delivered to patients by providing a range of strategic professional advice and expertise                               |
| Royal Colleges                                   | 19                      | Membership organisations and professional bodies that promote quality standards and support professionals through education and training.                    |
| Professional Associations                        | 45                      | Professional associations are commonly multidisciplinary societies with voluntary registration status that promote the interests of the group they represent |
|                                                  | Total 109               |                                                                                                                                                              |

### Functions and activities of the wider regulatory landscape

Figure 4, shows the different patterns of regulatory activity for all the organisations which can influence providers' behaviour. The multitude of organisations that are simultaneously involved in various types of activities overseeing healthcare is striking.

-FIGURE 4 INSERTED HERE-

All of the eight professional regulators offer accreditation services, register health care professionals, provide standards of care, collect performance data, conduct research and carry out investigations in case of complaints against a practitioner. These organisations perform broadly similar functions, as one might expect, although this does not mean that they carry out in the same way or have the same underlying model of regulation.

The activities of the regulators of services are much more varied. There is no reason to think that all these organisations should do exactly the same thing, but the variability in approach and overlapping functions suggest that there is no overall integrated regulatory approach. Inspections for assessing the quality of care, for instance, are undertaken by a variety of agencies, non-governmental, governmental and regional that use different approaches and methods. The inspection process can take different forms, both in terms of measurements, review focus and data used.

#### Overlapping functions and activities

There are a multitude of overlapping functions and activities and we can only provide a small number of examples here. We identified thirteen regulators and 50 local or national organisations from the wider landscape responsible for inspection visits (45), accreditation assessments (72), with a remit to impose sanctions (35) that specifically relate to patient safety. These covered safety inspections of specific clinical services or against national standards (for example, inspections by the Care Quality Commission and NHS Resolution), health and safety issues like fire standards, quality of training of junior doctors, granting licences and accreditation for sterile services, local post mortem and blood transfusion services, audits of internal governance structures etc. Some of the

1  
2  
3 organisations listed carry out separate inspections of different services. For example, the Royal College of  
4  
5 Psychiatrists carry out inspections against standards for mental health in-patients, high-security mental health  
6  
7 units and electroconvulsive treatment units. Similarly, in the acute care setting, Clinical Pathology Accreditation  
8  
9 UK may conduct separate visits for histopathology & cytology and haematology services.  
10  
11

12  
13 Investigation of serious incidents and complaints is the regulatory function performed by the majority of  
14  
15 overseeing agencies, 72 organisations in total. Agencies from both the regulators group (e.g. CQC, NHSI, HFEA,  
16  
17 HSE, CCGS, Coroners) and the wider landscape (Royal Colleges) are involved in investigating activities either by  
18  
19 conducting these themselves, or by overseeing the quality of serious incident investigations and ensuring action  
20  
21 plans are completed.  
22  
23

24  
25 Although a multitude of overseeing agencies conduct or oversee investigations, not all of them exert the power  
26  
27 to impose sanctions. Specifically only CQC, NHSI, HFEA, HSE, and EA have the authority to impose sanctions and  
28  
29 enforcement measures to provider organisations.  
30  
31  
32  
33  
34  
35  
36  
37  
38  
39  
40  
41  
42  
43  
44  
45  
46  
47  
48  
49  
50  
51  
52  
53  
54  
55  
56  
57  
58  
59  
60

## DISCUSSION

In this research project we have documented the regulatory bodies engaged in influencing organisational performance. We divided the landscape into two broad categories; the main regulatory bodies with direct, statutory responsibilities, such as the Care Quality Commission or the Nursing and Midwifery Council, and other organisations that carry out some regulatory activities but have a more indirect influence -such as the Royal Colleges. We found that in total, 127 organisations are engaged in safety related regulatory in the NHS.

### The Impact on NHS Providers

Healthcare providers often find themselves accountable to a variety of uncoordinated enquiries (21–23). Drawing upon interviews with 47 NHS organisations, Walshe et al. (9) noted that Trusts were ‘concerned about the time required and workload involved in producing the portfolio of evidence’. Qualitative data from interviews with clinicians exploring the impact of inspection process upon trusts concluded that it generated significant additional work (23). Similarly, qualitative evaluations of regulatory agencies (24,25) provided similar evidence that Trusts found inspection processes burdensome, particularly as a result of large-scale and incoherent information requests from the overseeing agency.

Our study suggests that studies that have examined the benefits and burdens of regulation may have considerably underestimated the overall impact on NHS Trusts. NHS provider organisations in healthcare are faced with a bewildering range of disparate organisations and agencies all of whom play some role in the creation, monitoring and enforcement of safety standards; governmental agencies, organisations regulating professionals, manufacturers and suppliers of drugs and equipment, charities, patient advocacy groups, accreditors, professional associations, information technology groups and various others (26). These nested networks typically find it difficult to coordinate their interactions (27) creating confusion and often diverting resources into improvement efforts that are ineffective and inefficient (26,28). However, evidence of conflicting standards from different regulators, various data requirements from multiple bodies, overlapping responsibilities, duplication of effort and

1  
2  
3 practical challenges in coordinating compliance and providing assurance to external overseeing actors have been  
4  
5 extensively documented (29–32).  
6  
7

### 8 **Future research on regulation** 9

10  
11 Given the extent and cost of regulatory activity in the NHS and elsewhere one might think there would be  
12  
13 considerable interest in understanding its cost, efficacy and impact on patient care. A small number of  
14  
15 investigations suggest that regulation can act as a driver for change, although regulators rarely identify  
16  
17 unanticipated problems. For instance, three studies on cardiac surgery in the US, found that mandatory  
18  
19 performance reporting was positively correlated with better patient care (33–35). Overall empirical evidence on  
20  
21 the direct benefits of the various regulatory regimes is sparse and evaluation of cost and cost-effectiveness non-  
22  
23 existent (24,36).  
24  
25  
26

27  
28 The true costs, benefits and burden of regulation in the NHS have never been properly assessed. In particular  
29  
30 future research should carry out a full assessment and costings of the time spent by Trusts in responding to  
31  
32 regulatory requests of all kinds and from all relevant organisations, including both statutory regulators and those  
33  
34 with regulatory influence. The costing should obviously include both resources used by regulatory organisations  
35  
36 and those they regulate. Only after such an exercise will we be able to see what proportion of the NHS budget is  
37  
38 truly devoted to regulation. Given that each NHS provider may potentially receive attention from dozens of  
39  
40 regulatory organisations a significant proportion of the NHS budget may unwittingly be devoted to regulation.  
41  
42  
43

### 44 **The need and benefit of a massive simplification** 45

46  
47  
48 The regulatory system of the NHS has evolved rather than been designed and is not fully understood even by  
49  
50 professional regulators; it is almost impossible for the general public to navigate the system. Regulation is  
51  
52 important and the actions of thoughtful and well-intentioned regulatory organisations have the potential to  
53  
54 improve standards. However the overall impact of the totality of the regulatory system makes it impossible for  
55  
56 regulators to act effectively and places a massive burden on NHS providers which almost certainly detracts from  
57  
58 safety and quality improvement initiatives. A full mapping of the resources consumed would be a major  
59  
60

1  
2  
3 undertaking but could lead to a major simplification of the current system which in turn could produce huge  
4  
5 savings and more effective regulation.  
6  
7

## 8 **Conclusion**

9  
10  
11 In this project we have mapped out the regulatory landscape for patient safety in the NHS. Although we  
12  
13 identified all organisations with regulatory influence through an exhaustive review process, we cannot be sure  
14  
15 that we identified all organisations exerting any regulatory effect. Regulation provides a variety of benefits in  
16  
17 terms of maintaining the safety and quality of care by providing a useful external perspective on the care  
18  
19 being delivered. However, the magnitude of the regulatory system makes it hard for regulators to act effectively  
20  
21 and places a massive burden on NHS providers which almost certainly detracts from safety and quality  
22  
23 improvement initiatives. Further exploration, through interviews or direct observation of visits to Trusts, might  
24  
25 expand the impact on regulation on NHS providers.  
26  
27  
28  
29  
30  
31  
32  
33  
34  
35  
36  
37  
38  
39  
40  
41  
42  
43  
44  
45  
46  
47  
48  
49  
50  
51  
52  
53  
54  
55  
56  
57  
58  
59  
60

## DECLARATIONS

- **Authors' contributions**

CV and JC and CM conceptualised the study and CV oversaw the scientific direction. EO conducted the mapping process and CV JC and CM contributed to the final categorisation of organisations. EO drafted the paper and CV, JC and CM revised the paper. All authors read and approved the final manuscript.

- **A patient consent form:**

Not applicable for this research project.

- **Data sharing**

The datasets used and analysed during the current study are available from the corresponding author on reasonable request.



## REFERENCES

1. Gunningham N. Regulatory reform and reflexive regulation: beyond command and control. Reflexive governance for global public goods. MIT Press; 2012.
2. Flodgren G, Pomey M-P, Taber SA, Eccles MP. Effectiveness of external inspection of compliance with standards in improving healthcare organisation behaviour, healthcare professional behaviour or patient outcomes. 2011 [cited 2018 Dec 9]; Available from: [www.cqc.org.uk/](http://www.cqc.org.uk/)
3. Brennan T. The Role of Regulation in Quality Improvement [Internet]. Vol. 76, The Milbank Quarterly. 1998 [cited 2018 Dec 13]. Available from: [https://www.ncbi.nlm.nih.gov/pmc/articles/PMC2751097/pdf/milq\\_111.pdf](https://www.ncbi.nlm.nih.gov/pmc/articles/PMC2751097/pdf/milq_111.pdf)
4. Braithwaite J, Coglianese C, Levi-Faur D. Can regulation and governance make a difference? Regul Gov [Internet]. 2007;1(1):1–7. Available from: <http://doi.wiley.com/10.1111/j.1748-5991.2007.00006.x>
5. Walshe K, Higgins J. The use and impact of inquiries in the NHS The development of NHS inquiries. BMJ [Internet]. 2002 [cited 2018 Dec 9];19(325):895–900. Available from: <https://www.ncbi.nlm.nih.gov/pmc/articles/PMC1124388/pdf/895.pdf>
6. Walshe K. Regulation and Inspection of Health ServicesIn: Martin, S, & Davis, H, eds. Public Services Inspection in the UK. London, UK [Internet]. Jessica Kingsley Publishers; 2008 [cited 2018 Dec 9]. 160 p. Available from: [https://books.google.co.uk/books?hl=en&lr=&id=7\\_wPBQAAQBAJ&oi=fnd&pg=PP1&dq=Regulation+and+Inspection+of+Health+Services.+In:+Martin,+S,+%26+Davis,+H,+eds.+Public+Services+Inspection+in+the+UK.+London,+UK&ots=Q1NxIK6BG-&sig=EwjBy7hreC\\_12goveppqEyZskQM#v=o](https://books.google.co.uk/books?hl=en&lr=&id=7_wPBQAAQBAJ&oi=fnd&pg=PP1&dq=Regulation+and+Inspection+of+Health+Services.+In:+Martin,+S,+%26+Davis,+H,+eds.+Public+Services+Inspection+in+the+UK.+London,+UK&ots=Q1NxIK6BG-&sig=EwjBy7hreC_12goveppqEyZskQM#v=o)
7. Francis R. Report of the Mid Staffordshire NHS Foundation Trust Public Inquiry : executive summary. Stationery Office; 2013.

- 1  
2  
3 8. Berwick D. A Promise to Learn—a commitment to act: Improving the Safety of Patients in England.  
4  
5 London; 2013.  
6  
7
- 8  
9 9. Walshe K. The rise of regulation in the NHS [Internet]. [cited 2018 Dec 9]. Available from:  
10  
11 [www.npsa.org.uk](http://www.npsa.org.uk)  
12
- 13  
14 10. NHS Confederation. What's it all for? Reducing unnecessary bureaucracy in regulation. 2009.  
15
- 16  
17 11. Professional Standards Authority. Rethinking regulation [Internet]. 2015 [cited 2018 Dec 9]. Available  
18  
19 from: [www.professionalstandards.org.uk](http://www.professionalstandards.org.uk)  
20
- 21  
22 12. National Audit Office. A Short Guide to: Selected health arm's-length bodies [Internet]. 2017 [cited 2018  
23  
24 Dec 9]. Available from: [https://www.nao.org.uk/wp-content/uploads/2017/12/A-Short-Guide-to-](https://www.nao.org.uk/wp-content/uploads/2017/12/A-Short-Guide-to-Selected-health-arms-length-bodies.pdf)  
25  
26 [Selected-health-arms-length-bodies.pdf](https://www.nao.org.uk/wp-content/uploads/2017/12/A-Short-Guide-to-Selected-health-arms-length-bodies.pdf)  
27
- 28  
29 13. The King's Fund [Internet]. [cited 2011 Aug 20]. Available from: <https://www.kingsfund.org.uk/>  
30  
31
- 32  
33 14. NHS Improvement [Internet]. Available from: <https://improvement.nhs.uk/>  
34  
35
- 36  
37 15. Human Fertilisation and Embryology Authority [Internet]. [cited 2018 Dec 13]. Available from:  
38  
39 <https://www.hfea.gov.uk/>  
40
- 41  
42 16. Health and Safety Executive [Internet]. [cited 2018 Dec 13]. Available from: <http://www.hse.gov.uk/>  
43  
44
- 45  
46 17. Environment Agency [Internet]. [cited 2018 Dec 13]. Available from:  
47  
48 <https://www.gov.uk/government/organisations/environment-agency/about>  
49
- 50  
51 18. The Coroners' Society of England & Wales [Internet]. [cited 2018 Dec 13]. Available from:  
52  
53 <https://www.coronersociety.org.uk/>  
54
- 55  
56 19. Medicines and Healthcare products Regulatory Agency [Internet]. [cited 2018 Dec 13]. Available from:  
57  
58 <https://www.gov.uk/government/organisations/medicines-and-healthcare-products-regulatory-agency>  
59  
60

- 1  
2  
3 20. Professional Standards Authority [Internet]. [cited 2018 Dec 13]. Available from:  
4  
5 <https://www.professionalstandards.org.uk/home>  
6  
7  
8  
9 21. Hood C, And OJ, Scott C. Regulation of government: has it increased, is it increasing should it be  
10 diminished? [cited 2018 Dec 13]; Available from: [https://onlinelibrary.wiley.com/doi/pdf/10.1111/1467-](https://onlinelibrary.wiley.com/doi/pdf/10.1111/1467-9299.00206)  
11 [9299.00206](https://onlinelibrary.wiley.com/doi/pdf/10.1111/1467-9299.00206)  
12  
13  
14  
15  
16 22. P Hampton. Reducing administrative burdens: effective inspection and enforcement. HM Stationery  
17 Office; 2005.  
18  
19  
20  
21  
22 23. Martin SJ. Regulation inside government: Processes and impacts of inspection of local public services.  
23 2007 [cited 2018 Dec 13]; Available from: <https://www.researchgate.net/publication/27649747>  
24  
25  
26  
27 24. Day P. The NHS Improvers: A Study of the Commission for Health Improvement [Internet]. King's Funds;  
28 2004 [cited 2018 Dec 13]. Available from: [https://researchportal.bath.ac.uk/en/publications/the-nhs-](https://researchportal.bath.ac.uk/en/publications/the-nhs-improvers-a-study-of-the-commission-for-health-improvement)  
29 [improvers-a-study-of-the-commission-for-health-improvement](https://researchportal.bath.ac.uk/en/publications/the-nhs-improvers-a-study-of-the-commission-for-health-improvement)  
30  
31  
32  
33  
34  
35 25. Benson LA, Boyd A, Walshe K. Learning from regulatory interventions in healthcare. Clin Gov An Int J  
36 [Internet]. 2006 Jul [cited 2018 Dec 13];11(3):213–24. Available from:  
37 <http://www.emeraldinsight.com/doi/10.1108/14777270610683146>  
38  
39  
40  
41  
42 26. Dixon-Woods M, Pronovost PJ. Patient safety and the problem of many hands. [cited 2018 Dec 13];  
43 Available from: <http://qualitysafety.bmj.com/>  
44  
45  
46  
47  
48 27. Klijn E-H, Koppenjan J. Complexity in Governance Network Theory. Complexity, Gov Networks [Internet].  
49 2014 Jun 28 [cited 2018 Dec 13];1(1):61–70. Available from: [http://ubp.uni-](http://ubp.uni-bamberg.de/ojs/index.php/cgn/article/view/20)  
50 [bamberg.de/ojs/index.php/cgn/article/view/20](http://ubp.uni-bamberg.de/ojs/index.php/cgn/article/view/20)  
51  
52  
53  
54  
55  
56 28. Austin JM, Jha AK, Romano PS, Singer SJ, Vogus TJ, Wachter RM, et al. National Hospital Ratings Systems  
57 Share Few Common Scores And May Generate Confusion Instead Of Clarity. Health Aff [Internet]. 2015  
58  
59  
60

- 1  
2  
3 Available from: <http://www.healthaffairs.org/doi/10.1377/hlthaff.2014.0201>  
4  
5  
6  
7 29. NHS Providers. The impact of regulation in a shifting environment. 2017.  
8  
9  
10 30. NHS Providers. Maximising the value from the regulatory approach. 2015.  
11  
12  
13 31. NHS Providers. The changing nature of regulation in the NHS. 2018.  
14  
15  
16 32. Edwards N. Burdensome regulation of the NHS. *BMJ* [Internet]. 2016 [cited 2018 Dec 13]; Available from:  
17 <http://www.bmj.com/permissionsSubscribe:http://www.bmj.com/subscribeBMJ2016;353:i3414doi:10.1>  
18 <http://www.bmj.com/permissionsSubscribe:http://www.bmj.com/subscribeBMJ2016;353:i3414doi:10.1>  
19 <http://www.bmj.com/permissionsSubscribe:http://www.bmj.com/subscribeBMJ2016;353:i3414doi:10.1>  
20 <http://www.bmj.com/permissionsSubscribe:http://www.bmj.com/subscribeBMJ2016;353:i3414doi:10.1>  
21 <http://www.bmj.com/permissionsSubscribe:http://www.bmj.com/subscribeBMJ2016;353:i3414doi:10.1>  
22 <http://www.bmj.com/permissionsSubscribe:http://www.bmj.com/subscribeBMJ2016;353:i3414doi:10.1>  
23 <http://www.bmj.com/permissionsSubscribe:http://www.bmj.com/subscribeBMJ2016;353:i3414doi:10.1>  
24 33. Cutler DM, Huckman RS, Landrum MB. The Role of Information in Medical Markets: An Analysis of  
25 Publicly Reported Outcomes in Cardiac Surgery. *Am Econ Rev* [Internet]. 2004 Apr [cited 2018 Dec  
26 13];94(2):342–6. Available from: <http://pubs.aeaweb.org/doi/10.1257/0002828041301993>  
27 <http://pubs.aeaweb.org/doi/10.1257/0002828041301993>  
28 <http://pubs.aeaweb.org/doi/10.1257/0002828041301993>  
29 <http://pubs.aeaweb.org/doi/10.1257/0002828041301993>  
30  
31 34. Peterson ED, DeLong ER, Jollis JG, Muhlbaier LH, Mark DB. The Effects of New York’s Bypass Surgery  
32 Provider Profiling on Access to Care and Patient Outcomes in the Elderly [Internet]. Vol. 32, *Journal of the*  
33 *American College of Cardiology*. 1998 [cited 2018 Dec 13]. Available from:  
34 <http://www.onlinejacc.org/content/accj/32/4/993.full.pdf>  
35 <http://www.onlinejacc.org/content/accj/32/4/993.full.pdf>  
36 <http://www.onlinejacc.org/content/accj/32/4/993.full.pdf>  
37 <http://www.onlinejacc.org/content/accj/32/4/993.full.pdf>  
38 <http://www.onlinejacc.org/content/accj/32/4/993.full.pdf>  
39 <http://www.onlinejacc.org/content/accj/32/4/993.full.pdf>  
40  
41 35. Hannan EL, Kumar D, Racz M, Siu AL, Chassin MR. New York state’s cardiac surgery reporting system:  
42 Four years later. *Ann Thorac Surg* [Internet]. 1994 Dec 1 [cited 2018 Dec 13];58(6):1852–7. Available  
43 from: <https://linkinghub.elsevier.com/retrieve/pii/0003497594917264>  
44 <https://linkinghub.elsevier.com/retrieve/pii/0003497594917264>  
45 <https://linkinghub.elsevier.com/retrieve/pii/0003497594917264>  
46 <https://linkinghub.elsevier.com/retrieve/pii/0003497594917264>  
47 <https://linkinghub.elsevier.com/retrieve/pii/0003497594917264>  
48  
49 36. Walshe K, Addicott R, Boyd A, Robertson R RS. Evaluating the Care Quality Commission’s acute hospital  
50 regulatory model: final report. Manchester, London; 2014.  
51  
52  
53  
54  
55  
56  
57  
58  
59  
60

1  
2  
3  
4  
5  
6  
7  
8  
9  
10  
11  
12  
13  
14  
15  
16  
17  
18  
19  
20  
21  
22  
23  
24  
25  
26  
27  
28  
29  
30  
31  
32  
33  
34  
35  
36  
37  
38  
39  
40  
41  
42  
43  
44  
45  
46  
47  
48  
49  
50  
51  
52  
53  
54  
55  
56  
57  
58  
59  
60

**APPENDIX**

-Appendix Figure 1 INSERTED HERE-

For peer review only

Overview of Healthcare Regulation Map

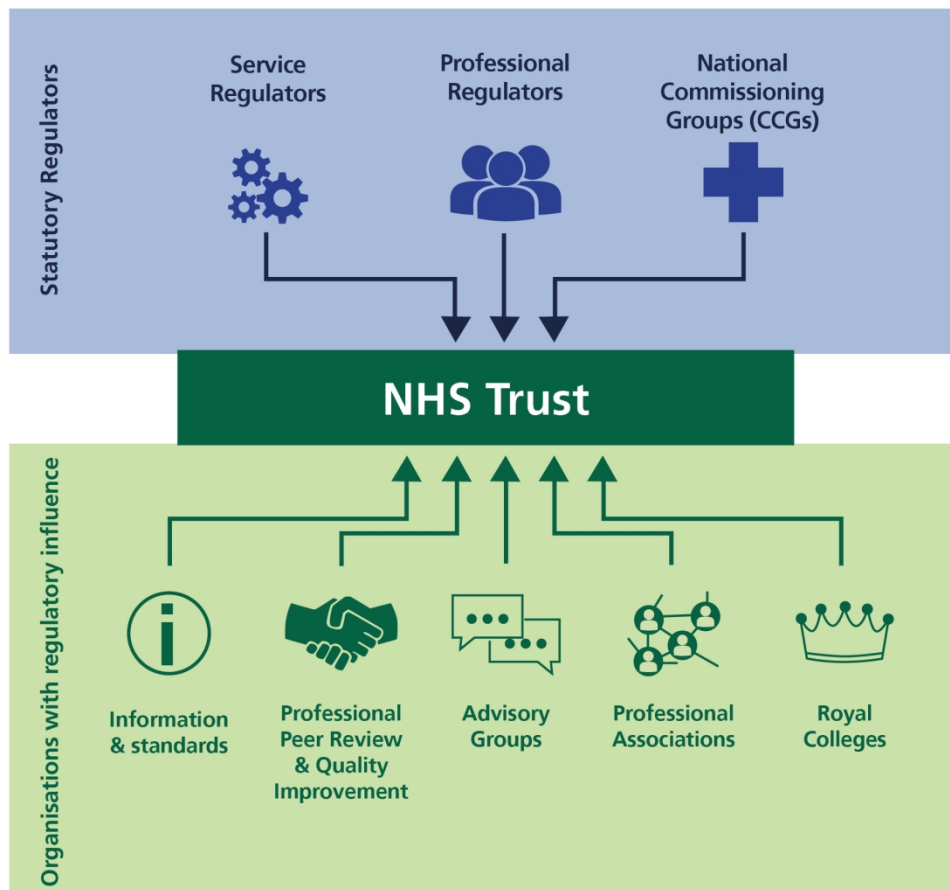

Overview of Health care Regulation Map

162x162mm (300 x 300 DPI)

## Regulatory activities and definitions

| Activities                                                          | Definitions                                                                                         |
|---------------------------------------------------------------------|-----------------------------------------------------------------------------------------------------|
| <b>Registration</b>                                                 | Registration of healthcare professionals to ensure compliance with legal requirements.              |
| <b>Accreditation</b>                                                | Accreditation, licensing or revalidation to maintain and assure professional skills                 |
| <b>Policy provider</b>                                              | Setting of formal rules and guidelines.                                                             |
| <b>Monitoring of services and professionals</b>                     | Systematic collection of information to assess and maintain standards of care                       |
| <b>Investigation</b>                                                | Formal examination of an incident.                                                                  |
| <b>Inspection</b>                                                   | Formal examination or visit to assess standards of care.                                            |
| <b>Imposition of sanctions</b>                                      | Penalties or fines for disobeying a law or rule.                                                    |
| <b>Quality improvement</b>                                          | Performance analysis and systematic attempt to improve it.                                          |
| <b>Analysis and sharing of data</b>                                 | Collection of data, analysis and potentially sharing with other regulatory organisation.            |
| <b>Advice and support for the public</b>                            | Publishing performance evaluations or other information on standards.                               |
| <b>Advice and support health care providers or other regulators</b> | Providing professional or legal advice to professionals and organisations.                          |
| <b>Representation</b>                                               | Representing professionals in the maintenance of standards.                                         |
| <b>Professional development</b>                                     | Programmes of education and training to equip professionals with knowledge, skills and competences. |
| <b>Research</b>                                                     | Systematic investigation of events and information relevant to maintaining standards                |

### Regulatory Activities and Definitions

175x199mm (300 x 300 DPI)

Regulators and Organisations with Regulatory Influence

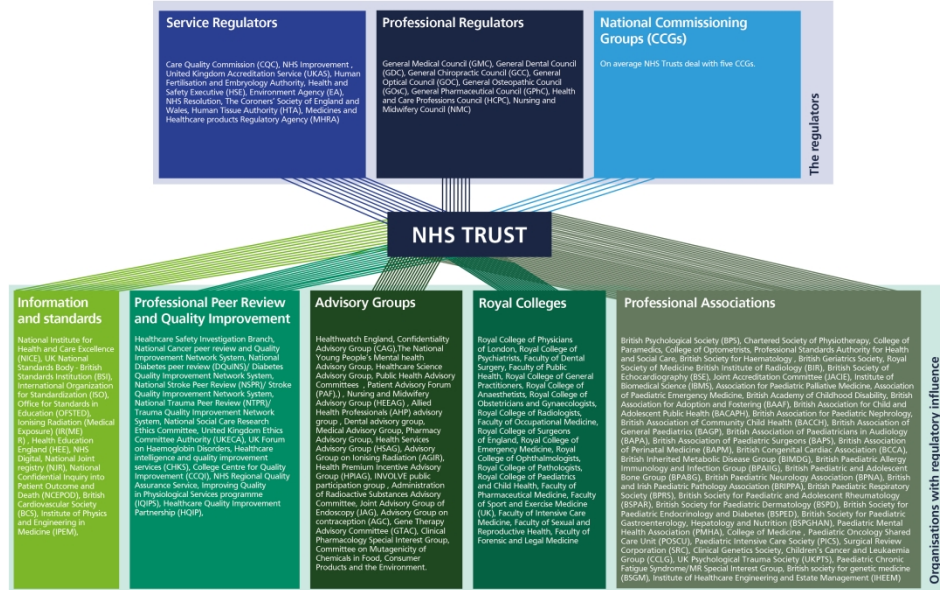

Regulators and Organisations with Regulatory Influence

279x189mm (300 x 300 DPI)



1  
2  
3  
4  
5  
6  
7  
8  
9  
10  
11  
12  
13  
14  
15  
16  
17  
18  
19  
20  
21  
22  
23  
24  
25  
26  
27  
28  
29  
30  
31  
32  
33  
34  
35  
36  
37  
38  
39  
40  
41  
42  
43  
44  
45  
46  
47  
48  
49  
50  
51  
52  
53  
54  
55  
56  
57  
58  
59  
60

Regulatory functions and activities

|                                      |                           | Standard setting | Registration | Accreditation | Policy provider | Monitoring | Investigation | Inspect | Sanctions | Quality Improvement | Data & feedback | Public advice and support | Healthcare advice and support | Advocacy | Training | Research |   |
|--------------------------------------|---------------------------|------------------|--------------|---------------|-----------------|------------|---------------|---------|-----------|---------------------|-----------------|---------------------------|-------------------------------|----------|----------|----------|---|
| Regulators                           | Services                  |                  |              |               |                 |            |               |         |           |                     |                 |                           |                               |          |          |          |   |
|                                      | CQC                       | •                | •            | •             | •               | •          | •             | •       | •         | •                   | •               | •                         | •                             |          |          |          |   |
|                                      | NHSI                      |                  |              |               | •               | •          | •             |         | •         | •                   | •               | •                         | •                             |          | •        |          |   |
|                                      | UKAS                      | •                |              | •             |                 |            |               |         |           |                     |                 |                           |                               |          |          |          |   |
|                                      | HFEA                      |                  | •            | •             | •               | •          | •             | •       |           | •                   | •               | •                         | •                             |          |          | •        |   |
|                                      | HSE                       | •                |              | •             | •               | •          | •             | •       | •         |                     | •               | •                         | •                             |          | •        | •        |   |
|                                      | EA                        | •                |              |               | •               | •          | •             | •       | •         |                     |                 |                           |                               |          |          |          |   |
|                                      | NHS Resolution            |                  |              |               |                 |            |               |         |           |                     |                 | •                         | •                             | •        | •        |          |   |
|                                      | Coroners                  |                  |              |               |                 |            | •             |         |           |                     |                 |                           |                               |          |          |          | • |
|                                      | HTA                       | •                |              | •             | •               |            |               | •       | •         | •                   |                 | •                         | •                             |          |          | •        | • |
|                                      | MHRA                      | •                |              |               | •               |            | •             | •       | •         |                     | •               | •                         | •                             |          |          | •        | • |
|                                      | Professionals             | GMC              | •            | •             | •               | •          | •             | •       | •         |                     | •               | •                         | •                             |          |          | •        | • |
|                                      | GDC                       | •                | •            | •             | •               | •          | •             | •       | •         |                     | •               | •                         | •                             |          |          | •        | • |
|                                      | GCC                       | •                | •            | •             | •               | •          | •             | •       | •         |                     | •               | •                         | •                             |          |          | •        | • |
| GOC                                  | •                         | •                | •            | •             | •               | •          | •             | •       |           | •                   | •               | •                         |                               |          | •        | •        |   |
| GOsC                                 | •                         | •                | •            | •             | •               | •          | •             | •       |           | •                   | •               | •                         |                               |          | •        | •        |   |
| GPhC                                 | •                         | •                | •            | •             | •               | •          | •             | •       |           | •                   | •               | •                         |                               |          | •        | •        |   |
| HCPC                                 | •                         | •                | •            | •             | •               | •          | •             | •       |           | •                   | •               | •                         |                               | •        | •        | •        |   |
| NMC                                  | •                         | •                | •            | •             | •               | •          | •             | •       | •         | •                   | •               | •                         |                               |          | •        | •        |   |
| CCGs                                 | •                         | •                | •            | •             | •               | •          | •             | •       | •         | •                   | •               | •                         |                               |          | •        | •        |   |
| Organisations with regulatory effect | Information & standards   | •                |              |               | •               | •          | •             | •       | •         | •                   | •               | •                         | •                             |          | •        | •        |   |
|                                      | Peer Review               |                  |              |               |                 | •          | •             | •       | •         | •                   | •               | •                         | •                             |          |          | •        | • |
|                                      | Advisory Groups           |                  |              |               |                 | •          | •             | •       | •         | •                   | •               | •                         | •                             |          |          | •        | • |
|                                      | Royal Colleges            | •                | •            | •             | •               |            | •             | •       | •         | •                   | •               | •                         | •                             |          | •        | •        | • |
|                                      | Professional Associations |                  | •            | •             |                 |            |               |         |           |                     |                 |                           |                               |          | •        | •        | • |

Regulatory Functions and Activities

250x209mm (300 x 300 DPI)

Full list of Regulators and Influencing Organisations

|                                                               |                                                                                                                                                                                                                                                                                                                                                                                                                                                                                                                                                                                                                                                                                                                                                                                                                                                                                                                                                                                                                                                                                                                                                                                                                                                                                                                                                                                                                                                                                                                                                                                                                                                                                                                                                                                                                                                                                                                                                                                                                                 |
|---------------------------------------------------------------|---------------------------------------------------------------------------------------------------------------------------------------------------------------------------------------------------------------------------------------------------------------------------------------------------------------------------------------------------------------------------------------------------------------------------------------------------------------------------------------------------------------------------------------------------------------------------------------------------------------------------------------------------------------------------------------------------------------------------------------------------------------------------------------------------------------------------------------------------------------------------------------------------------------------------------------------------------------------------------------------------------------------------------------------------------------------------------------------------------------------------------------------------------------------------------------------------------------------------------------------------------------------------------------------------------------------------------------------------------------------------------------------------------------------------------------------------------------------------------------------------------------------------------------------------------------------------------------------------------------------------------------------------------------------------------------------------------------------------------------------------------------------------------------------------------------------------------------------------------------------------------------------------------------------------------------------------------------------------------------------------------------------------------|
| <b>Regulators</b>                                             |                                                                                                                                                                                                                                                                                                                                                                                                                                                                                                                                                                                                                                                                                                                                                                                                                                                                                                                                                                                                                                                                                                                                                                                                                                                                                                                                                                                                                                                                                                                                                                                                                                                                                                                                                                                                                                                                                                                                                                                                                                 |
| <b>Services Regulators</b><br>10                              | Care Quality Commission (CQC), NHS Improvement , United Kingdom Accreditation Service (UKAS), Human Fertilisation and Embryology Authority, Health and Safety Executive (HSE), Environment Agency (EA), NHS Resolution, The Coroners' Society of England and Wales, Human Tissue Authority (HTA), Medicines and Healthcare products Regulatory Agency (MHRA)                                                                                                                                                                                                                                                                                                                                                                                                                                                                                                                                                                                                                                                                                                                                                                                                                                                                                                                                                                                                                                                                                                                                                                                                                                                                                                                                                                                                                                                                                                                                                                                                                                                                    |
| <b>Professional Regulators</b><br>8                           | General Medical Council (GMC), General Dental Council (GDC), General Chiropractic Council (GCC), General Optical Council (GOC), General Osteopathic Council (GOSc), General Pharmaceutical Council (GPhC), Health and Care Professions Council (HCPC), Nursing and Midwifery Council (NMC)                                                                                                                                                                                                                                                                                                                                                                                                                                                                                                                                                                                                                                                                                                                                                                                                                                                                                                                                                                                                                                                                                                                                                                                                                                                                                                                                                                                                                                                                                                                                                                                                                                                                                                                                      |
| <b>Organisations with regulatory influence</b>                |                                                                                                                                                                                                                                                                                                                                                                                                                                                                                                                                                                                                                                                                                                                                                                                                                                                                                                                                                                                                                                                                                                                                                                                                                                                                                                                                                                                                                                                                                                                                                                                                                                                                                                                                                                                                                                                                                                                                                                                                                                 |
| <b>Information and standards</b><br>11                        | National Institute for Health and Care Excellence (NICE), UK National Standards Body - British Standards Institution (BSI), International Organization for Standardization (ISO), Office for Standards in Education (OFSTED), Ionising Radiation (Medical Exposure) (IR(ME)R) , Health Education England (HEE), NHS Digital, National Joint registry (NJR), National Confidential Inquiry into Patient Outcome and Death (NCEPOD), British Cardiovascular Society (BCS), Institute of Physics and Engineering in Medicine (IPEM)                                                                                                                                                                                                                                                                                                                                                                                                                                                                                                                                                                                                                                                                                                                                                                                                                                                                                                                                                                                                                                                                                                                                                                                                                                                                                                                                                                                                                                                                                                |
| <b>Professional Peer Review and Quality Improvement</b><br>13 | Healthcare Safety Investigation Branch, National Cancer peer review and Quality Improvement Network System, National Diabetes peer review (DQuINS)/ Diabetes Quality Improvement Network System, National Stroke Peer Review (NSPR)/ Stroke Quality Improvement Network System, National Trauma Peer Review (NTPR)/ Trauma Quality Improvement Network System, National Social Care Research Ethics Committee, United Kingdom Ethics Committee Authority (UKECA), UK Forum on Haemoglobin Disorders, Healthcare intelligence and quality improvement services (CHK5), College Centre for Quality Improvement (CCQI), NHS Regional Quality Assurance Service, Improving Quality in Physiological Services programme (IQIPS), Healthcare Quality Improvement Partnership (HQIP)                                                                                                                                                                                                                                                                                                                                                                                                                                                                                                                                                                                                                                                                                                                                                                                                                                                                                                                                                                                                                                                                                                                                                                                                                                                   |
| <b>Advisory Groups</b><br>21                                  | Healthwatch England, Confidentiality Advisory Group (CAG),The National Young People's Mental health Advisory Group, Healthcare Science Advisory Group, Public Health Advisory Committees , Patient Advisory Forum (PAF), , Nursing and Midwifery Advisory Group (HEEAG) , Allied Health Professionals (AHP) advisory group , Dental advisory group, Medical Advisory Group, Pharmacy Advisory Group, Health Services Advisory Group (HSAG), Advisory Group on Ionising Radiation (AGIR), Health Premium Incentive Advisory Group (HPIAG), INVOLVE public participation group , Administration of Radioactive Substances Advisory Committee, Joint Advisory Group of Endoscopy (JAG), Advisory Group on contraception (AGC), Gene Therapy Advisory Committee (GTAC), Clinical Pharmacology Special Interest Group, Committee on Mutagenicity of Chemicals in Food, Consumer Products and the Environment                                                                                                                                                                                                                                                                                                                                                                                                                                                                                                                                                                                                                                                                                                                                                                                                                                                                                                                                                                                                                                                                                                                         |
| <b>Royal Colleges</b><br>19                                   | Royal College of Physicians of London, Royal College of Psychiatrists, Faculty of Dental Surgery, Faculty of Public Health, Royal College of General Practitioners, Royal College of Anaesthetists, Royal College of Obstetricians and Gynaecologists, Royal College of Radiologists, Faculty of Occupational Medicine, Royal College of Surgeons of England, Royal College of Emergency Medicine, Royal College of Ophthalmologists, Royal College of Pathologists, Royal College of Paediatrics and Child Health, Faculty of Pharmaceutical Medicine, Faculty of Sport and Exercise Medicine (UK), Faculty of Intensive Care Medicine, Faculty of Sexual and Reproductive Health, Faculty of Forensic and Legal Medicine                                                                                                                                                                                                                                                                                                                                                                                                                                                                                                                                                                                                                                                                                                                                                                                                                                                                                                                                                                                                                                                                                                                                                                                                                                                                                                      |
| <b>Professional Associations</b><br>45                        | British Psychological Society (BPS), Chartered Society of Physiotherapy, College of Paramedics, College of Optometrists, Professional Standards Authority for Health and Social Care, British Society for Haematology , British Geriatrics Society, Royal Society of Medicine British Institute of Radiology (BIR), British Society of Echocardiography (BSE), Joint Accreditation Committee (JACIE), Institute of Biomedical Science (IBMS), Association for Paediatric Palliative Medicine, Association of Paediatric Emergency Medicine, British Academy of Childhood Disability, British Association for Adoption and Fostering (BAAF), British Association for Child and Adolescent Public Health (BACAPH), British Association for Paediatric Nephrology, British Association of Community Child Health (BACCH), British Association of General Paediatrics (BAGP), British Association of Paediatricians in Audiology (BAPA), British Association of Paediatric Surgeons (BAPS), British Association of Perinatal Medicine (BAPM), British Congenital Cardiac Association (BCCA), British Inherited Metabolic Disease Group (BIMDG), British Paediatric Allergy Immunology and Infection Group (BPAIG), British Paediatric and Adolescent Bone Group (BPABG), British Paediatric Neurology Association (BPNA), British and Irish Paediatric Pathology Association (BRIPPA), British Paediatric Respiratory Society (BPRS), British Society for Paediatric and Adolescent Rheumatology (BSPAR), British Society for Paediatric Dermatology (BSPD), British Society for Paediatric Endocrinology and Diabetes (BSPED), British Society for Paediatric Gastroenterology, Hepatology and Nutrition (BSPGHAN), Paediatric Mental Health Association (PMHA), College of Medicine , Paediatric Oncology Shared Care Unit (POSCU), Paediatric Intensive Care Society (PICS), Surgical Review Corporation (SRC), Clinical Genetics Society, Children's Cancer and Leukaemia Group (CCLG), UK Psychological Trauma Society (UKPTS) |

Full list of regulators and Influencing organisations

209x297mm (300 x 300 DPI)

# BMJ Open

## Patient safety regulation in the NHS: Mapping the regulatory landscape of healthcare.

|                                 |                                                                                                                                                                                                                                          |
|---------------------------------|------------------------------------------------------------------------------------------------------------------------------------------------------------------------------------------------------------------------------------------|
| Journal:                        | <i>BMJ Open</i>                                                                                                                                                                                                                          |
| Manuscript ID                   | bmjopen-2018-028663.R1                                                                                                                                                                                                                   |
| Article Type:                   | Research                                                                                                                                                                                                                                 |
| Date Submitted by the Author:   | 04-Apr-2019                                                                                                                                                                                                                              |
| Complete List of Authors:       | Oikonomou, Eirini; University of Oxford, Experimental Psychology<br>Carthey, Jane; Jane Carthey Consulting<br>Macrae, Carl; University of Nottingham, Business School<br>Vincent, Charles; University of Oxford, Experimental Psychology |
| <b>Primary Subject Heading</b>: | Health services research                                                                                                                                                                                                                 |
| Secondary Subject Heading:      | Health policy                                                                                                                                                                                                                            |
| Keywords:                       | health care, regulation, patient safety, mapping, statutory regulators, regulatory functions                                                                                                                                             |
|                                 |                                                                                                                                                                                                                                          |

SCHOLARONE™  
Manuscripts

1  
2  
3 **Patient safety regulation in the NHS: Mapping the regulatory landscape of healthcare.**  
4  
5

6  
7 Authors:

8  
9  
10 Eirini Oikonomou<sup>1</sup>, Jane Carthey<sup>2</sup>, Carl Macrae<sup>3</sup>, Charles Vincent<sup>1</sup>  
11  
12

13 Author affiliations:

- 14  
15  
16 1. Department of Experimental Psychology, University of Oxford, Oxford, UK  
17 [Eirini.oikonomou@psy.ox.ac.uk](mailto:Eirini.oikonomou@psy.ox.ac.uk) [Charles.vincent@psy.ox.ac.uk](mailto:Charles.vincent@psy.ox.ac.uk)  
18  
19 2. Jane Carthey Consulting, London, UK [Jane@janecarthey.com](mailto:Jane@janecarthey.com)  
20  
21 3. Nottingham University Business School, University of Nottingham, UK [Carlmacrae@mac.com](mailto:Carlmacrae@mac.com)  
22  
23  
24  
25

26 Correspondence to:

27  
28  
29 Eirini Oikonomou  
30

31  
32  
33 Email: [Eirini.oikonomou@psy.ox.ac.uk](mailto:Eirini.oikonomou@psy.ox.ac.uk)  
34  
35

36 Tel: + 44 (0) 7849462856  
37  
38

39 Word count: 4277  
40  
41

42 Keywords: health care, regulation, patient safety, mapping, statutory regulators, regulatory functions  
43  
44  
45  
46  
47  
48  
49  
50  
51  
52  
53  
54  
55  
56  
57  
58  
59  
60

## ABSTRACT

**Objectives:** The current research project sought to map out the regulatory landscape for patient safety in the NHS.

**Method:** We used a systematic desk-based search using a variety of sources to identify the total number of organisations with regulatory influence in the NHS; we researched publicly available documents listing external inspection agencies, participated in advisory consultations with NHS regulatory compliance teams and reviewed the websites of all regulatory agencies.

**Results:** Our mapping revealed over 126 organisations who exert some regulatory influence on NHS provider organisations in addition to 211 Clinical Commissioning Groups. The majority of these organisations set standards and collect data from provider organisations and a considerable number carry out investigations. We found a multitude of overlapping functions and activities. The variability in approach and overlapping functions suggest that there is no overall integrated regulatory approach.

**Conclusion:** Regulation potentially provides a variety of benefits in terms of maintaining the safety and quality of care by providing an external perspective on the care being delivered. However, the variability, extent and fragmentation of the regulatory system of the NHS make it hard for regulators to act effectively and places a massive burden on NHS provider organisations. Overlapping regulatory requests may distract locally driven initiatives to improve safety and quality. Further research is needed to understand the full extent of regulatory activity and the true benefits and costs incurred.

## ARTICLE SUMMARY

### Strengths and limitations the study

- This is the first study to attempt a complete mapping of all organisations engaged in regulatory activities in the NHS.
- We have included all statutory regulators but also many others who may not see themselves as regulators but nevertheless carry out regulatory activities.
- Understanding the full regulatory landscape enables more precise assessment of the benefits and costs of regulation.
- Due to resource constraints, we were only able to identify regulatory activities from the websites of the relevant organisations.
- Although we have searched extensively we cannot be sure that this is a complete mapping.

1  
2  
3 • **Funding**  
4  
5

6 This work was supported by The Health Foundation (90 Long Acre, London, WC2E 9RA)  
7  
8

9  
10 Email: [info@health.org.uk](mailto:info@health.org.uk). Grant number: 7531.  
11  
12

13 • **Competing interests**  
14

15 The authors declare that they have no competing interests.  
16  
17  
18  
19  
20  
21  
22  
23  
24  
25  
26  
27  
28  
29  
30  
31  
32  
33  
34  
35  
36  
37  
38  
39  
40  
41  
42  
43  
44  
45  
46  
47  
48  
49  
50  
51  
52  
53  
54  
55  
56  
57  
58  
59  
60

For peer review only

## INTRODUCTION

Regulation is one important means of monitoring and improving the safety of healthcare with the aim of ensuring safe, reliable treatment for patients and a safe working environment for healthcare professionals. Regulation in healthcare takes a variety of different forms and is conducted by many different actors, from formal regulatory inspections by statutory regulators to voluntary efforts to promote good practice. Regulatory processes and activities potentially provide valuable feedback to provider organisations, supporting improvement and ensuring that high standards of performance are maintained (1). Critics argue that although regulation may have valuable effects that it is too often ineffective (2), inflexible (3) and generates ticking box behaviour and bureaucratic compliance (4).

A number of organisations and commentators have called for reform, proposing that the regulatory system needs to be simpler, organised around a common approach to regulation and less burdensome for providers (5,6). However, before such broad proposals can be given proper consideration a fundamental question must be addressed. What is the nature and extent of the current system? In this study we aimed to map the current regulatory system for patient safety in the NHS, including both statutory regulators and other organisations with regulatory influence. Understanding this landscape of regulation of safety is an essential preliminary to any rational reform of the regulatory system but has, to our knowledge, never been previously attempted.

### **Regulation, regulators and patient safety**

The term “regulation” can be viewed negatively and narrowly by those who are subject to regulatory oversight (7). In healthcare settings in particular ‘regulation’ can often be seen as intrusive and inefficient interference by external authorities that distracts from the important tasks of clinical care (8). Regulation in healthcare is usually interpreted as a narrow set of formal activities conducted by government agencies or other statutory bodies (8). However, activities of regulation are typically both much broader and more constructive than this (9,10). Regulation represents a wide range of different activities that seek to shape motives and attitudes within organisations, as well as policies and protocols (11). In healthcare, regulatory activities can encompass everything



1  
2  
3 from formal regulatory inspections, attempts to promote good practice, to efforts to support and initiate culture  
4 improvement (12,13). Moreover, regulatory activities are commonly engaged in by a diverse range of different  
5  
6 actors and institutions across healthcare, from statutory regulators to national agencies to professional bodies to  
7  
8 charitable organisations.  
9

10  
11  
12 The regulatory landscape of healthcare is therefore complex and multi-faceted. To begin mapping the current  
13 regulatory system around patient safety it is necessary to define the scope of our enquiries. In this study we define  
14 patient safety regulation as *the processes engaged in by institutional actors that seek to shape, monitor, control*  
15 *or modify activities within healthcare organisations in order to reduce the risk of patients being harmed during*  
16 *their care*. This definition aims to focus attention on the specific activities that are engaged in by 'external' actors  
17  
18 to influence 'internal' processes of patient safety in healthcare organisations. It also aims to encompass the  
19  
20 breadth of diverse institutional actors that engage in these processes of regulation, even when some of those  
21  
22 actors may not define themselves as formal 'regulators'.  
23  
24  
25  
26  
27  
28  
29  
30

### 31 **Evolution of regulation in the NHS**

32  
33  
34 To provide a brief historical perspective on regulation across the NHS, the 1944 National Health Service White  
35 Paper recognised that regular inspections of hospitals would be valuable but the first true external oversight body  
36  
37 was not established until 1969, following a series of healthcare scandals (14). Until the late 1970s, the Department  
38  
39 of Health fulfilled most of the regulatory functions, but between 1979 and 1997, the Conservative administration  
40  
41 created a number of regulatory bodies (such as the NHS Litigation Authority, now NHS Resolution). However,  
42  
43 broad sectors of the NHS remained free of statutory external oversight or regulation throughout this period (15).  
44  
45  
46  
47  
48

49  
50 Several high-profile failures of care in the 1990s (including the problems at the Bristol Royal Infirmary, Royal  
51  
52 Liverpool Children's Hospital) eroded public trust in the NHS. The Labour Government adopted a more  
53  
54 interventionist approach to regulation, increasing the depth, detail and complexity of inspection processes (5).  
55  
56 The National Institute for Clinical Excellence (NICE) was established in 1999 and the Commission for Health  
57  
58 Improvement (CHI), the ancestor of the Care Quality Commission, was founded in 2001 to oversee and inspect  
59  
60

1  
2  
3 the clinical quality of all NHS services. The 2013 Francis report on the Mid Staffordshire failings of care was a  
4 defining moment for the whole regulatory regime which had failed to detect and respond to early signs of  
5 organisational failure (16). The governmental response generated more structural changes to the system, with an  
6 increased focus on devolution of central oversight.  
7  
8  
9  
10

11  
12  
13 The evolution of regulation in the NHS needs to be seen in the context of continual widespread reform and  
14 restructuring of the wider NHS. In 2002, the National Health Service Reform and Health Care Professionals Act  
15 merged 95 health authorities into 28 strategic health authorities (SHAs)(17). In 2006, the number of SHAs reduced  
16 to 10 and later transformed into four clusters (North, South, Midlands and East of England) before finally been  
17 abolished in April 2013 (18). During this time, health services commissioning was undertaken by 481 Primary Care  
18 Groups (PCGs), later reduced to 152 of Primary Care Trusts (PCTs) in 2002, solely responsible for all NHS  
19 commissioning (17). Finally, under the Health and Social Care Act in 2012, PCTs were replaced by statutory,  
20 commissioning “consortia”, the Clinical Commissioning Groups (CCGs)(19).  
21  
22  
23  
24  
25  
26  
27  
28  
29  
30

31  
32 The 5 Year Forward review (20) brought the planning and regulation of primary, secondary and social care  
33 together with local authority influence under seven models of care each covering a core set of related services  
34 (for instance, urgent and emergency care networks). Local leaders in 44 geographical areas have been asked to  
35 design sustainability and transformation plans (STPs) to demonstrate how they intend to transform services in  
36 their local areas(21). Ten Integrated care systems (ICSs) have evolved from STPs responsible for planning and  
37 commissioning care for their populations(22).  
38  
39  
40  
41  
42  
43  
44  
45

#### 46 **The need to map the regulatory landscape of the NHS**

47  
48  
49

50 This short overview of regulation history in the UK demonstrates a stream of structural reforms over the past 25  
51 years, which have gradually increased the extent and complexity of the regulatory structures (16,23). In 2002  
52 Walshe argued that: ‘Current regulators vary widely in their statutory authority, powers, scope of action, and  
53 approach. The resulting mosaic of regulatory arrangements is highly fragmented and some roles are duplicated’  
54 (24). Since then, the complexity of the system has increased considerably. A report from the NHS Confederation  
55  
56  
57  
58  
59  
60

1  
2  
3 argued that this complexity places an unnecessary burden on healthcare organisations when, for example,  
4 different regulators request evidence for similar safety standards (25). The Professional Standards Authority has  
5 pointed out that all the nine bodies they oversee have a common set of functions yet there are differences in  
6 legislation, standards, approach, efficiency, amongst others (6).  
7  
8  
9  
10  
11  
12

13 In this study we attempted to map the complete landscape of all organisations with patient safety regulatory  
14 effect on NHS providers and consider the impact of this system on NHS provider organisations. This means  
15 identifying all organisations which exert regulatory influence, not just those designated as statutory regulators. In  
16 our preliminary inquiries it appeared that no one, not even regulatory organisations, had a complete  
17 understanding of all the bodies with regulatory impact on the NHS.  
18  
19  
20  
21  
22  
23  
24

## 25 **METHODOLOGY**

### 26 **Defining safety regulation**

27  
28 We intended to examine all institutional actors that sought to have some form of regulatory impact on healthcare  
29 organisations. This of course includes agencies with statutory responsibilities, but many other organisations exert  
30 regulatory influence through standard setting, analysis and feedback of data, inspection and other activities. To  
31 capture this wider landscape, we defined organisations with regulatory impact as those who fulfilled all of the  
32 following four criteria:  
33  
34  
35  
36  
37  
38  
39  
40  
41  
42

- 43 • Consider the improvement of patient safety a part of their organisational responsibilities.
  - 44 • Undertake some form of monitoring or oversight of safety related standards or performance.
  - 45 • Engage in formal attempts to influence the safety performance of NHS provider organisations (there are  
46 a variety of ways this can be achieved in practice).
  - 47 • Derive some form of legitimacy or external authority for their work on safety.
- 48  
49  
50  
51  
52  
53  
54  
55  
56  
57  
58  
59  
60

## Mapping process

We used a variety of sources to gradually build up a picture of the patient safety regulatory landscape of the NHS. Firstly, we identified publicly available documents listing external inspection agencies for five NHS Trusts- two community, two acute and one mental health. These lists summarise regulatory visits, inspections, assessments and accreditations made by regulatory bodies. This exercise provided an initial list of regulatory agencies. The Trusts themselves admitted that they were not sure of how many agencies were visiting them or requiring information. Advisory consultations with members of Trusts' regulatory compliance teams complemented the final list of agencies involved in overseeing healthcare providers.

We then scanned the official websites of all statutory regulatory agencies. We also searched for existing collaborations and partnerships with other institutions which increased the number of organisations detected.

The review eventually evaluated over 200 organisations in some way involved in overseeing healthcare together with over 200 Clinical Commissioning Groups. We then refined this list to include only those organisations meeting the four inclusion criteria set out above. We then classified all these organisations under three broad categories according to their core aim (i) statutory regulators of services, such as the Care Quality Commission; (ii) statutory regulators of professionals, such as the General Medical Council and (iii) organisations with regulatory influence and effect (such as Royal Colleges and standard setting organisations) (Figure 1). In case organisations fell under more than one cluster, a decision was reached through discussions among members of the research group.

-FIGURE 1 INSERT HERE-

## Describing regulatory activities of organisations

To gain a more in-depth understanding of the patient safety related activities these organisations carry out, we documented how they monitor professional performance, the way they evaluate compliance with standards and what actions are involved in approaching perceived deficiencies (e.g. enforcement sanctions, public ratings, legal prosecution etc.).

1  
2  
3 We reviewed a variety of sources; official websites, statutory instruments, reports, and other records (e.g.  
4 information enfolded in various electronic domains such as; annual reviews, strategic plans, meeting minutes etc.)  
5  
6 and identified a list of external oversight functions. We then simplified the list by removing duplicates and  
7  
8 combining activities which were essentially similar but described in different ways by different organisations. We  
9  
10 additionally consulted a small advisory group of healthcare regulation experts, both practitioners and researchers,  
11  
12 to reach consensus on classifying the activities into a more concise list. Based upon consensus among the authors,  
13  
14 all regulators and regulatory actors carry out 15 overseeing functions (Figure 2).  
15  
16  
17  
18  
19

20 -FIGURE 2 INSERTED HERE-  
21

### 22 **Ethical approval**

23  
24  
25  
26 Ethical approval was given for this study by the University of Oxford Clinical Trials and Research Governance  
27  
28 (CTRG) team with REC reference number: R30976/RE001.  
29

### 30 **Patient involvement**

31  
32  
33  
34 A small advisory group with patient representatives supported the design of the project. Preliminary findings were  
35  
36 presented to a larger seminar at the Health Foundation with several patient representatives present.  
37  
38  
39  
40  
41  
42  
43  
44  
45  
46  
47  
48  
49  
50  
51  
52  
53  
54  
55  
56  
57  
58  
59  
60

## RESULTS

Our mapping revealed that over 126 organisations exert some safety regulatory effect on NHS provider organisations in addition to Health Services Commissioners; 211 Clinical Commissioning Groups and 10 Integrated Care Systems (ICS) (Figure 3). We emphasise that many of these organisations would not see themselves as regulators and indeed regulation is usually not their primary function. They do all nevertheless exert some regulatory influence on the NHS. The extent of their influence and activity varies widely and only a proportion of these organisations may be in contact with any one NHS Trust. A full list of organisations identified is presented in 'Appendix Figure 1' in the Appendix.

-FIGURE 3 INSERTED HERE-

### Oversight of the system

Three national bodies that fund, lead and support healthcare in England; Department of Health and Social Care (DHSC), NHS England and Public Health England (PHE).

The DHSC is a ministerial department responsible for overseeing the system and is supported by 28 arm's length bodies (26). NHS England oversees the operation of 211 Clinical Commissioning Groups (CCGs) and directly commissions specialist services and primary care including GPs, pharmacists, dental practices, military and a number of local health services. Its main role is to set the priorities and direction of the NHS and to improve health and care outcomes for people in England. Public Health England (PHE) is an executive agency of the DHSC with operational autonomy. PHE works with local government, Parliament, industry and national bodies to support public health services such as immunisation and screening programmes.

### Health Services Commissioners

Clinical Commissioning Groups

1  
2  
3 Clinical Commissioning Groups (CCGs) are independent, NHS statutory bodies responsible for the planning and  
4 commissioning of health care services within their local area. Each NHS provider organisation will work with only  
5 a limited number of CCGs, which may vary in their remit and functions.  
6  
7  
8

9  
10 The majority of health services, including emergency care, elective hospital care, maternity services, community  
11 and mental health services and general practices are commissioned by the CCGs (27). Currently, there are 211  
12 clinical commissioning groups in England, responsible for 2/3 of the total NHS England budget. CCGs operate as a  
13 strong influencer for improving patient safety at provider level through their role in securing public involvement  
14 and seeking assurance providers are meeting safety standards.  
15  
16  
17  
18  
19  
20  
21  
22

### 23 Integrated care systems

24  
25 Ten Integrated care systems (ICSs) are involved the wider health services commissioning landscape as they bring  
26 together NHS providers, commissioners and local authorities to work in partnership for improving health and care  
27 in their area (22). ICSs are led by NHS and local government leaders and are based on voluntary collaboration.  
28 Their principal functions are: Aligning commissioning plans; incorporating the regulatory functions of NHS England  
29 and NHS Improvement and planning and managing performance in their areas. Responsibility for service delivery  
30 rests with the organisations that provide care within ICSs and many of these organisations are collaborating to  
31 put in place Integrated Care Plans (ICPs) (22).  
32  
33  
34  
35  
36  
37  
38  
39  
40  
41  
42  
43  
44  
45  
46  
47  
48  
49  
50  
51  
52  
53  
54  
55  
56  
57  
58  
59  
60

## STATUTORY REGULATORS

Statutory regulators operate with a mandate to oversee organisations, services, professionals and healthcare products. They often develop quality standards, offer accreditation services and support professionals through education and training. The full list of statutory regulators is presented in Table 1.

Table 1. *Statutory regulators of the NHS.*

| <b>Services Regulators: 10</b>                             | <b>Professionals Regulators: 8</b>         |
|------------------------------------------------------------|--------------------------------------------|
| Care Quality Commission (CQC)                              | General Medical Council (GMC)              |
| NHS Improvement                                            | General Dental Council (GDC)               |
| United Kingdom Accreditation Service (UKAS)                | General Chiropractic Council (GCC)         |
| Human Fertilisation and Embryology Authority               | General Optical Council (GOC)              |
| Health and Safety Executive (HSE)                          | General Osteopathic Council (GOsC)         |
| Environment Agency (EA)                                    | General Pharmaceutical Council (GPhC)      |
| NHS Litigation Resolution                                  | Health and Care Professions Council (HCPC) |
| The Coroners' Society of England and Wales                 | Nursing and Midwifery Council (NMC)        |
| Human Tissue Authority (HTA)                               |                                            |
| Medicines and Healthcare Products Regulatory Agency (MHRA) |                                            |



## Regulators of services

Ten statutory bodies overseeing health care systems and clinical settings such as hospitals, care homes and general practices. Their scope of functions includes providing standards and guidelines as well as monitoring healthcare providers' safety performance to establish compliance with policies and quality standards. They have statutory powers to impose enforcing measures which span from suspension or removal from the registry in case of non-compliance to criminal prosecution and penalties.

The Care Quality Commission (CQC) is the primary healthcare regulator in England. It is an independent agency, established in 2009 and is responsible for registering, inspecting, monitoring and rating services of health care providers in England. Its central role includes investigating, licencing, supporting healthcare providers by introducing quality improvement strategies and collecting clinical data and performance metrics that could reveal problems within services.

NHS Improvement, (NHSI) a non-departmental agency monitoring financial and operational functions across the health sector. NHSI works closely with CQC in holding NHS boards to account and providing specialised support to providers under-or at risk of being under- special measures, stabilising and improving their performance (28)

Other organisations of this cohort are involved in assessing, accrediting and licencing health care services. For example, the Human Fertilisation and Embryology Authority (HFEA) is the statutory body that regulates and inspects all in vitro fertilisation (IVF) healthcare settings, assessing compliance and publishing policy papers (29).

The Health and Safety Executive, a body responsible for regulating workplace health and safety and NHS Resolution (Former NHS Litigation Authority) managing complaints and negligence against the NHS (30). Equally, the Environment Agency (EA) is accountable for medical waste regulation (31) and Coroners and Medicines and Healthcare products Regulatory Agency are both involved in serious incidents investigations making inquiries into healthcare providers and enforcing sanctions (32,33)

### Regulators of professionals

Eight statutory bodies oversee the practice of health care professionals. Professional regulators have multiple responsibilities in addition to strictly regulatory activities. They also seek to improve education and training, provide support to health professionals throughout their professional career, from mentoring during training, to emotional support services during investigations. Regulatory functions include registering of professionals, revalidation, training and imposing sanctions where necessary.

The Professionals Standards Authority (PSA) oversees the above eight regulators. PSA is an independent body, accountable to the Parliament and it sets standards for those organisations that maintain voluntary registers and accredits those that meet them (34). Although their scope of action includes monitoring regulators' performance, conducting audits, reviewing decisions regarding fitness to practice and reporting to Parliament, they do not identify themselves as a regulator. PSA can apply conditions and suspend or remove accreditation from healthcare professionals but does not have the statutory power to investigate complaints about the regulators they oversee (19).

### Organisations with regulatory influence

We found 104 other organisations that critically seek to influence the safety performance of NHS provider organisations. These organisations do not, for the most part, see themselves as regulators. However, these organisations meet the four criteria set out above, being concerned with patient safety, seeking to influence standards and deriving some form of external legitimacy. They therefore exert regulatory influence on provider organisations.

While they do not see themselves as regulators, these organisations nevertheless carry out some regulatory activities (Table 2) and have a significant impact on the provider organisations. The group comprises national agencies (e.g. National Institute for Health and Clinical Excellence (NICE), professional bodies (e.g. Royal College of Physicians), patient organisations and charities exerting regulatory effects through norm-setting and support

1  
2  
3 (e.g. Healthwatch England, Action Against Medical Accidents). Table 2 summarises the institutions with regulatory  
4  
5 effect.  
6  
7

8  
9 The majority of these organisations set standards of some kind with which they seek to influence provider  
10  
11 organisations. Most collect data from provider organisations and a considerable number carry out investigations  
12  
13 of some kind when circumstances require. A few can use sanctions such as the withdrawal of accreditation for  
14  
15 training. Table 2 provides a summary of the various regulatory activities of each category of the influencing  
16  
17 organisations.  
18  
19  
20  
21  
22  
23  
24  
25  
26  
27  
28  
29  
30  
31  
32  
33  
34  
35  
36  
37  
38  
39  
40  
41  
42  
43  
44  
45  
46  
47  
48  
49  
50  
51  
52  
53  
54  
55  
56  
57  
58  
59  
60

For peer review only

Table 2. *Organisations with regulatory influence*

| Categories                                              | Number of organisations |                                                                                                                                                               |
|---------------------------------------------------------|-------------------------|---------------------------------------------------------------------------------------------------------------------------------------------------------------|
| <b>Information and standards</b>                        | 11                      | Operate with a mandate to develop national standards and recommendations through evidence-based research, in collaboration with health care experts' teams.   |
| <b>Professional Peer Review and Quality Improvement</b> | 13                      | Health professional networks, aiming to promote collaboration between health care organisations.                                                              |
| <b>National advisory Groups</b>                         | 21                      | Engaged in improving quality of care delivered to patients by providing a range of strategic professional advice and expertise.                               |
| <b>Royal Colleges</b>                                   | 19                      | Membership organisations and professional bodies that promote quality standards and support professionals through education and training.                     |
| <b>Professional Associations</b>                        | 40                      | Professional associations are commonly multidisciplinary societies with voluntary registration status that promote the interests of the group they represent. |
|                                                         | Total: 104              |                                                                                                                                                               |

## Functions and activities of the wider regulatory landscape

Figure 4 shows the different patterns of regulatory activity for all the organisations which can influence providers' behaviour. The multitude of organisations that are simultaneously involved in various types of activities overseeing healthcare is striking.

-FIGURE 4 INSERTED HERE-

All eight professional regulators offer accreditation services, register health care professionals, provide standards of care, collect performance data, conduct research and carry out investigations in case of complaints against a practitioner. These organisations perform broadly similar functions, as one might expect, although this does not mean that they carry out activities in the same way or have the same underlying model of regulation.

The activities of the regulators of services are much more varied. There is no reason to think that all these organisations should do exactly the same thing, but the variability in approach and overlapping functions suggest that there is no overall integrated regulatory approach. Inspections for assessing the quality of care, for instance, are undertaken by a variety of agencies, non-governmental, governmental and regional that use different approaches and methods. The inspection process can take different forms, both in terms of measurements, review focus and data used.

### Overlapping functions and activities

There are a multitude of overlapping functions and activities and we can only provide a small number of examples here. We identified thirteen regulators and 50 local or national organisations from the wider landscape responsible for inspection visits [45], accreditation assessments [72], with a remit to impose sanctions [35] that specifically relate to patient safety. These covered safety inspections of specific clinical services or against national standards (for example, inspections by the Care Quality Commission and NHS Resolution), health and safety issues like fire standards, quality of training of junior doctors, granting licences and accreditation for sterile services, local post mortem and blood transfusion services, audits of internal governance structures etc. Some of the

1  
2  
3 organisations listed carry out separate inspections of different services. For example, the Royal College of  
4  
5 Psychiatrists carry out inspections against standards for mental health in-patients, high-security mental health  
6  
7 units and electroconvulsive treatment units. Similarly, in the acute care setting, Clinical Pathology Accreditation  
8  
9 UK may conduct separate visits for histopathology & cytology and haematology services.  
10  
11

12  
13 Investigation of serious incidents and complaints is the regulatory function performed by the majority of  
14  
15 overseeing agencies, 72 organisations in total. Agencies from both the regulators group (e.g. CQC, NHSI, HFEA,  
16  
17 HSE, CCGS, Coroners) and the wider landscape (Royal Colleges) are involved in investigating activities either by  
18  
19 conducting these themselves, or by overseeing the quality of serious incident investigations and ensuring action  
20  
21 plans are completed.  
22  
23

24  
25 Although a multitude of overseeing agencies conduct or oversee investigations, not all of them exert the power  
26  
27 to impose sanctions. Specifically, only CQC, NHSI, HFEA, HSE, and EA have the authority to impose sanctions and  
28  
29 enforcement measures to provider organisations.  
30  
31

## DISCUSSION

In this research project we have documented the regulatory bodies engaged in influencing organisational performance. We divided the landscape into two broad categories; the main regulatory bodies with direct, statutory responsibilities, such as the Care Quality Commission or the Nursing and Midwifery Council, and other organisations that carry out some regulatory activities but have a more indirect influence, such as the Royal Colleges. We found that in total, 126 organisations are engaged in safety related regulatory in the NHS. To our knowledge, this is the first attempt to carry out a full mapping exercise of healthcare regulatory actors in England.

The existence of multiple regulatory actors (13), the complexity and rapid changes of the regulatory environment (35) and influences on health care practice (36) and service delivery (37) have been widely documented in various contexts e.g. England, Australia, New Zealand (38). Healthcare providers often find themselves accountable to a variety of uncoordinated large scale data enquiries (39–41). Such enquiries often create duplication of work and can undermine the relationship of regulators and those on the receiving end.

NHS provider organisations in healthcare are often faced with a wide range of disparate organisations and agencies all of whom play some role in the creation, monitoring and enforcement of safety standards; governmental agencies, organisations regulating professionals, manufacturers and suppliers of drugs and equipment, charities, patient advocacy groups, accreditors, professional associations, information technology groups and various others (42). These nested networks typically find it difficult to coordinate their interactions (43) which can create confusion on the receiving end and sometimes divert resources into ineffective improvement efforts (42,44). Evidence of overlapping responsibilities, duplication of effort, practical challenges in coordinating regulatory compliance and providing assurance have been extensively documented (29–32). For example, drawing upon interviews with 47 NHS organisations, Walshe et al. (24) noted that Trusts were 'concerned about the time required and workload involved in producing the portfolio of evidence' (9). The findings of this mapping exercise suggest that Trusts are potentially dealing with large numbers of organisations when assembling this evidence and responding to requests.

1  
2  
3 In addition, new institutional actors, such as the Healthcare Safety Investigation Branch (HSIB), are emerging. HSIB  
4 is purposefully positioned outside the existing regulatory structures that surround patient safety in the English  
5 NHS, and actively seeks to investigate and examine the sources of serious risks to patient safety that emerge  
6 across the healthcare system, and make recommendations to a range of actors regarding how the healthcare  
7 system might be improved. An intentional focus is on investigating and improving regulators and the regulatory  
8 system itself (45). It remains to be seen how these activities will unfold and whether independent, system-wide  
9 investigators are able to influence change and improvement to individual regulators and the regulators landscape  
10 as a whole.  
11  
12  
13  
14  
15  
16  
17  
18  
19  
20  
21

22 Our study suggests that studies that have examined the benefits and burdens of regulation may have considerably  
23 underestimated the overall impact on NHS Trusts. Future empirical studies of the benefits and burdens of  
24 regulation might need to look beyond the impact of statutory regulators to the wider regulatory landscape set  
25 out here. This mapping will also enable more targeted studies of the regulatory process in which the specific  
26 activities of the multiple organisations engaged can be examined. The true costs, benefits and burden of  
27 regulation in the NHS have never been properly assessed. In particular, future research should carry out a full  
28 assessment and costings of the time spent by Trusts in responding to regulatory requests of all kinds and from all  
29 relevant organisations, including both statutory regulators and those with regulatory influence. The costing should  
30 obviously include both resources used by regulatory organisations and those they regulate. Only after such an  
31 exercise will we be able to see what proportion of the NHS budget is truly devoted to regulation.  
32  
33  
34  
35  
36  
37  
38  
39  
40  
41  
42  
43  
44

## 45 **Conclusion**

46  
47  
48 In this project we have mapped out the regulatory landscape for patient safety in the NHS. Although we identified  
49 all organisations with regulatory influence through an exhaustive review process, we cannot be sure that we  
50 identified all organisations exerting any regulatory effect. The regulatory system of the NHS has evolved rather  
51 than been designed and is not fully understood even by professional regulators; it is almost impossible for the  
52 general public to navigate the system. Regulation is important and the actions of thoughtful and well-intentioned  
53 regulatory organisations have the potential to improve standards. However, the overall impact of the regulatory  
54  
55  
56  
57  
58  
59  
60



1  
2  
3 system hinders the effectiveness of regulatory actors and can be challenging for NHS providers detracting from  
4 safety and quality improvement initiatives. A full analysis of the time and resource devoted to safety regulations,  
5 and as assessment of the costs and benefits, would be a major undertaking but could potentially lead to a major  
6 simplification of the current system, which in turn could produce much more effective and responsive regulation.  
7  
8  
9  
10  
11  
12  
13  
14  
15  
16  
17  
18  
19  
20  
21  
22  
23  
24  
25  
26  
27  
28  
29  
30  
31  
32  
33  
34  
35  
36  
37  
38  
39  
40  
41  
42  
43  
44  
45  
46  
47  
48  
49  
50  
51  
52  
53  
54  
55  
56  
57  
58  
59  
60

For peer review only

1  
2  
3  
4  
5  
6  
7  
8  
9  
10  
11  
12  
13  
14  
15  
16  
17  
18  
19  
20  
21  
22  
23  
24  
25  
26  
27  
28  
29  
30  
31  
32  
33  
34  
35  
36  
37  
38  
39  
40  
41  
42  
43  
44  
45  
46  
47  
48  
49  
50  
51  
52  
53  
54  
55  
56  
57  
58  
59  
60

## FIGURE LEGENDS

**Figure 1.** Overview of Health Care Regulation Map.

**Figure 2.** Regulatory Activities and Definitions.

**Figure 3.** Regulators and Organisations with Regulatory Influence.

**Figure 4.** Regulatory Functions and Activities.

**Figure 5.** Full List of Regulators and Influencing Organisations.

For peer review only

## DECLARATIONS

- **Authors' contributions**

CV, JC, and CM conceptualised the study and CV oversaw the scientific direction. EO conducted the mapping process and CV JC and CM contributed to the final categorisation of organisations. EO drafted the paper and CV, JC and CM revised the paper. All authors read and approved the final manuscript.

- **A patient consent form:**

Not applicable for this research project.

- **Data sharing**

The datasets used and analysed during the current study are available from the corresponding author on reasonable request.

## REFERENCES

1. Gunningham N. Regulatory reform and reflexive regulation: beyond command and control. Reflexive governance for global public goods. MIT Press; 2012.
2. Flodgren G, Pomey M-P, Taber SA, Eccles MP. Effectiveness of external inspection of compliance with standards in improving healthcare organisation behaviour, healthcare professional behaviour or patient outcomes. 2011 [cited 2018 Dec 9]; Available from: [www.cqc.org.uk/](http://www.cqc.org.uk/)
3. Brennan T. The Role of Regulation in Quality Improvement . Vol. 76, The Milbank Quarterly. 1998 [cited 2018 Dec 13]. Available from: [https://www.ncbi.nlm.nih.gov/pmc/articles/PMC2751097/pdf/milq\\_111.pdf](https://www.ncbi.nlm.nih.gov/pmc/articles/PMC2751097/pdf/milq_111.pdf)
4. Braithwaite J, Coglianese C, Levi-Faur D. Can regulation and governance make a difference? Regul Gov . 2007;1(1):1–7. Available from: <http://doi.wiley.com/10.1111/j.1748-5991.2007.00006.x>
5. Edwards N. Burdensome regulation of the NHS. BMJ . 2016 [cited 2018 Dec 13]; Available from: <http://www.bmj.com/permissionsSubscribe:http://www.bmj.com/subscribeBMJ2016;353:i3414doi:10.1136/bmj.i3414>
6. Professional Standards Authority. Rethinking regulation . 2015 [cited 2018 Dec 9]. Available from: [www.professionalstandards.org.uk](http://www.professionalstandards.org.uk)
7. Braithwaite V. Ten things you need to know about regulation but never wanted to ask. . 2006 [cited 2019 Mar 14]. Available from: <http://regnet.anu.edu.au/sites/default/files/publications/attachments/2015-07/10thingswhole.pdf>
8. Macrae C. Reconciling Regulation and Resilience. In Hollnagel, E., Braithwaite, J., and Wears, R. (Eds). In Ashgate; 2013 [cited 2019 Mar 14]. p. 297. Available from: <https://books.google.co.uk/books?hl=en&lr=&id=8AWiAgAAQBAJ&oi=fnd&pg=PT20&dq=Reconciling+Re>

- 1  
2  
3  
4  
5  
6  
7  
8  
9  
10  
11  
12  
13  
14  
15  
16  
17  
18  
19  
20  
21  
22  
23  
24  
25  
26  
27  
28  
29  
30  
31  
32  
33  
34  
35  
36  
37  
38  
39  
40  
41  
42  
43  
44  
45  
46  
47  
48  
49  
50  
51  
52  
53  
54  
55  
56  
57  
58  
59  
60
- gulation+and+Resilience.&ots=TN2oLA8dMI&sig=vdzmbsvuWhaFc53y46QXsK5b\_7Q#v=onepage&q=Rec  
onciling Regulation and Resilience.&f=false
9. Braithwaite J. The Essence of Responsive Regulation . Vol. 44, U.B.C. Law Review. 2011 [cited 2019 Mar 14]. Available from:  
<https://heinonline.org/HOL/Page?handle=hein.journals/ubclr44&id=489&div=29&collection=journals>
10. Macrae C. Regulating resilience? Regulatory work in high-risk arenas. In Hutter, B. (Ed). In: Anticipating Risks and Organising Risk Regulation . Cambridge: Cambridge University Press; 2010 [cited 2019 Mar 14]. Available from:  
[https://books.google.co.uk/books?id=UUTwV4\\_NVe4C&pg=PA139&lpg=PA139&dq=Regulating+resilience?+Regulatory+work+in+high-risk+arenas.&source=bl&ots=mauzijtVwC&sig=ACfU3U1sRwVdCG5mA1ubYZuLrREUF1p5Bw&hl=en&sa=X&ved=2ahUKEwjKmomYjILhAhVFSBUIHfPODT8Q6AEwAnoECaCQ](https://books.google.co.uk/books?id=UUTwV4_NVe4C&pg=PA139&lpg=PA139&dq=Regulating+resilience?+Regulatory+work+in+high-risk+arenas.&source=bl&ots=mauzijtVwC&sig=ACfU3U1sRwVdCG5mA1ubYZuLrREUF1p5Bw&hl=en&sa=X&ved=2ahUKEwjKmomYjILhAhVFSBUIHfPODT8Q6AEwAnoECaCQ)
11. Shearing C. A constitutive conception of regulation. In P. Garbosky and J. Braithwaite (eds.) Business Regulation and Australia's Future. In Australian Institute of Criminology; 1993 [cited 2019 Mar 14]. Available from: [https://www.anu.edu.au/fellows/jbraithwaite/\\_documents/Articles/Business Regulation and Australias Future.pdf#page=79](https://www.anu.edu.au/fellows/jbraithwaite/_documents/Articles/Business%20Regulation%20and%20Australia's%20Future.pdf#page=79)
12. Mello MM, Kelly CN, Brennan TA. Fostering rational regulation of patient safety. J Health Polit Policy Law . 2005 Jun [cited 2019 Mar 14];30(3):375–426. Available from:  
<http://www.ncbi.nlm.nih.gov/pubmed/16089110>
13. Healy J. Improving Health Care Safety and Quality: Reluctant Regulators - Dr Judith Healy - Google Books . Aldershot: Ashgate; 2011 [cited 2019 Mar 14]. 1–170 p. Available from:  
[https://books.google.co.uk/books/about/Improving\\_Health\\_Care\\_Safety\\_and\\_Quality.html?id=HYh6BgAAQBAJ&printsec=frontcover&source=kp\\_read\\_button&redir\\_esc=y#v=onepage&q&f=false](https://books.google.co.uk/books/about/Improving_Health_Care_Safety_and_Quality.html?id=HYh6BgAAQBAJ&printsec=frontcover&source=kp_read_button&redir_esc=y#v=onepage&q&f=false)

- 1  
2  
3 14. Walshe K, Higgins J. The use and impact of inquiries in the NHS The development of NHS inquiries. BMJ .  
4  
5 2002 [cited 2018 Dec 9];19(325):895–900. Available from:  
6  
7 <https://www.ncbi.nlm.nih.gov/pmc/articles/PMC1124388/pdf/895.pdf>  
8  
9
- 10  
11 15. Walshe K. Regulation and Inspection of Health Services In: Martin, S, & Davis, H, eds. Public Services  
12  
13 Inspection in the UK. London, UK . Jessica Kingsley Publishers; 2008 [cited 2018 Dec 9]. 160 p. Available  
14  
15 from:  
16  
17 [https://books.google.co.uk/books?hl=en&lr=&id=7\\_wPBQAAQBAJ&oi=fnd&pg=PP1&dq=Regulation+and  
18  
19 +Inspection+of+Health+Services.+In:+Martin,+S,+%26+Davis,+H,+eds.+Public+Services+Inspection+in+the  
20  
21 +UK.+London,+UK&ots=Q1NxIK6BG-&sig=EwjBy7hreC\\_12goveppqEyZskQM#v=o](https://books.google.co.uk/books?hl=en&lr=&id=7_wPBQAAQBAJ&oi=fnd&pg=PP1&dq=Regulation+and+Inspection+of+Health+Services.+In:+Martin,+S,+%26+Davis,+H,+eds.+Public+Services+Inspection+in+the+UK.+London,+UK&ots=Q1NxIK6BG-&sig=EwjBy7hreC_12goveppqEyZskQM#v=o)  
22  
23
- 24  
25 16. Francis R. Report of the Mid Staffordshire NHS Foundation Trust Public Inquiry : executive summary.  
26  
27 Stationery Office; 2013.  
28  
29
- 30  
31 17. The Health Foundation. The National Health Service Reform and Health Care Professionals Act 2002 |  
32  
33 Policy Navigator . Policy Navigator. Available from: [https://navigator.health.org.uk/content/national-  
34  
35 health-service-reform-and-health-care-professionals-act-2002](https://navigator.health.org.uk/content/national-health-service-reform-and-health-care-professionals-act-2002)  
36  
37
- 38  
39 18. Turner D, Powell T. What is NHS commissioning? The origins of NHS commissioning . Commissioning by  
40  
41 PCTs. 2002 [cited 2019 Mar 5]. Available from: [www.parliament.uk/commons-  
42  
43 library%7Cintranet.parliament.uk/commons-library%7Cpapers@parliament.uk%7C@commonslibrary](http://www.parliament.uk/commons-library%7Cintranet.parliament.uk/commons-library%7Cpapers@parliament.uk%7C@commonslibrary)  
44  
45
- 46  
47 19. Naylor C, Curry N, Holder H, Ross S, Marshall L, Tait E. Clinical commissioning groups: Supporting  
48  
49 improvement in general practice? . 2013. Available from:  
50  
51 [https://www.kingsfund.org.uk/sites/default/files/field/field\\_publication\\_file/clinical-commissioning-  
52  
53 groups-report-ings-fund-nuffield-jul13.pdf](https://www.kingsfund.org.uk/sites/default/files/field/field_publication_file/clinical-commissioning-groups-report-ings-fund-nuffield-jul13.pdf)  
54  
55
- 56  
57 20. NHS. Five Year Forward View . 2014. Available from: [https://www.england.nhs.uk/wp-  
58  
59 content/uploads/2014/10/5yfv-web.pdf](https://www.england.nhs.uk/wp-content/uploads/2014/10/5yfv-web.pdf)  
60

- 1  
2  
3 21. Ham C, Alderwick H, Edwards N, Gainsbury S. Sustainability and transformation plans in London . 2017.  
4  
5 Available from: [www.kingsfund.org.uk](http://www.kingsfund.org.uk)  
6  
7
- 8  
9 22. The King's Fund. Making sense of integrated care systems, integrated care partnerships and accountable  
10 care organisations in the NHS in England | The King's Fund . London; 2018. Available from:  
11  
12 <https://www.kingsfund.org.uk/publications/making-sense-integrated-care-systems>  
13  
14
- 15  
16 23. Berwick D. A Promise to Learn—a commitment to act: Improving the Safety of Patients in England.  
17 London; 2013.  
18  
19
- 20  
21 24. Walshe K. The rise of regulation in the NHS . 2002 [cited 2018 Dec 9]. Available from: [www.npsa.org.uk](http://www.npsa.org.uk)  
22  
23
- 24  
25 25. NHS Confederation. What's it all for? Reducing unnecessary bureaucracy in regulation. 2009.  
26  
27
- 28  
29 26. National Audit Office. A Short Guide to: Selected health arm's-length bodies . 2017 [cited 2018 Dec 9].  
30 Available from: [https://www.nao.org.uk/wp-content/uploads/2017/12/A-Short-Guide-to-Selected-](https://www.nao.org.uk/wp-content/uploads/2017/12/A-Short-Guide-to-Selected-health-arms-length-bodies.pdf)  
31  
32 [health-arms-length-bodies.pdf](https://www.nao.org.uk/wp-content/uploads/2017/12/A-Short-Guide-to-Selected-health-arms-length-bodies.pdf)  
33  
34
- 35  
36 27. The King's Fund . [cited 2011 Aug 20]. Available from: <https://www.kingsfund.org.uk/>  
37  
38
- 39  
40 28. NHS Improvement . Available from: <https://improvement.nhs.uk/>  
41  
42
- 43  
44 29. Human Fertilisation and Embryology Authority . [cited 2018 Dec 13]. Available from:  
45  
46 <https://www.hfea.gov.uk/>  
47
- 48  
49 30. Health and Safety Executive . [cited 2018 Dec 13]. Available from: <http://www.hse.gov.uk/>  
50
- 51  
52 31. Environment Agency . [cited 2018 Dec 13]. Available from:  
53  
54 <https://www.gov.uk/government/organisations/environment-agency/about>  
55
- 56  
57 32. The Coroners' Society of England & Wales . [cited 2018 Dec 13]. Available from:  
58  
59 <https://www.coronersociety.org.uk/>  
60

- 1  
2  
3 33. Medicines and Healthcare products Regulatory Agency . [cited 2018 Dec 13]. Available from:  
4  
5 <https://www.gov.uk/government/organisations/medicines-and-healthcare-products-regulatory-agency>  
6  
7  
8  
9 34. Professional Standards Authority . [cited 2018 Dec 13]. Available from:  
10  
11 <https://www.professionalstandards.org.uk/home>  
12  
13  
14 35. Healy J, Braithwaite J. Designing safer health care through responsive regulation. *Med J Aust* . 2006 May  
15  
16 15;184(10):S56. Available from: [https://www.mja.com.au/journal/2006/184/10/designing-safer-health-](https://www.mja.com.au/journal/2006/184/10/designing-safer-health-care-through-responsive-regulation)  
17  
18 [care-through-responsive-regulation](https://www.mja.com.au/journal/2006/184/10/designing-safer-health-care-through-responsive-regulation)  
19  
20  
21  
22 36. Quick O. Regulating and legislating safety: the case for candour. *BMJ Qual Saf* . 2014; Available from:  
23  
24 <http://qualitysafety.bmj.com/>  
25  
26  
27  
28 37. Quick O. A scoping study on the effects of health professional regulation on those regulated. . 2011.  
29  
30 Available from: [https://www.professionalstandards.org.uk/docs/default-source/publications/research-](https://www.professionalstandards.org.uk/docs/default-source/publications/research-paper/study-on-the-effects-of-health-professional-regulation-on-those-regulated-2011.pdf)  
31  
32 [paper/study-on-the-effects-of-health-professional-regulation-on-those-regulated-2011.pdf](https://www.professionalstandards.org.uk/docs/default-source/publications/research-paper/study-on-the-effects-of-health-professional-regulation-on-those-regulated-2011.pdf)  
33  
34  
35 38. Healy J, Walton M. Health Ombudsmen in Polycentric Regulatory Fields: England, New Zealand, and  
36  
37 Australia. *Aust J Public Adm* . 2016 Dec 1;75(4):492–505. Available from:  
38  
39 <http://doi.wiley.com/10.1111/1467-8500.12187>  
40  
41  
42  
43 39. Hood C, And OJ, Scott C. Regulation of government: has it increased, is it increasing should it be  
44  
45 diminished? 2000 [cited 2018 Dec 13]; Available from:  
46  
47 <https://onlinelibrary.wiley.com/doi/pdf/10.1111/1467-9299.00206>  
48  
49  
50 40. P Hampton. Reducing administrative burdens: effective inspection and enforcement. HM Stationery  
51  
52 Office; 2005.  
53  
54  
55  
56 41. Martin SJ. Regulation inside government: Processes and impacts of inspection of local public services.  
57  
58 2007 [cited 2018 Dec 13]; Available from: <https://www.researchgate.net/publication/27649747>  
59  
60



- 1  
2  
3 42. Dixon-Woods M, Pronovost PJ. Patient safety and the problem of many hands. 2016 [cited 2018 Dec 13];  
4 Available from: <http://qualitysafety.bmj.com/>  
5  
6  
7  
8  
9 43. Klijn E-H, Koppenjan J. Complexity in Governance Network Theory. *Complexity, Gov Networks* . 2014 Jun  
10 28 [cited 2018 Dec 13];1(1):61–70. Available from: [http://ubp.uni-](http://ubp.uni-bamberg.de/ojs/index.php/cgn/article/view/20)  
11 [bamberg.de/ojs/index.php/cgn/article/view/20](http://ubp.uni-bamberg.de/ojs/index.php/cgn/article/view/20)  
12  
13  
14  
15  
16 44. Austin JM, Jha AK, Romano PS, Singer SJ, Vogus TJ, Wachter RM, et al. National Hospital Ratings Systems  
17 Share Few Common Scores And May Generate Confusion Instead Of Clarity. *Health Aff* . 2015 Mar 2  
18 [cited 2018 Dec 13];34(3):423–30. Available from:  
19 <http://www.healthaffairs.org/doi/10.1377/hlthaff.2014.0201>  
20  
21  
22  
23  
24  
25  
26 45. Macrae C, Vincent C. Learning from failure: the need for independent safety investigation in healthcare. *J*  
27 *R Soc Med* . 2014 Nov;107(11):439–43. Available from: <http://www.ncbi.nlm.nih.gov/pubmed/25359875>  
28  
29  
30  
31  
32  
33  
34  
35  
36  
37  
38  
39  
40  
41  
42  
43  
44  
45  
46  
47  
48  
49  
50  
51  
52  
53  
54  
55  
56  
57  
58  
59  
60

1  
2  
3  
4  
5  
6  
7  
8  
9  
10  
11  
12  
13  
14  
15  
16  
17  
18  
19  
20  
21  
22  
23  
24  
25  
26  
27  
28  
29  
30  
31  
32  
33  
34  
35  
36  
37  
38  
39  
40  
41  
42  
43  
44  
45  
46  
47  
48  
49  
50  
51  
52  
53  
54  
55  
56  
57  
58  
59  
60

**APPENDIX**

-Appendix Figure 1 INSERTED HERE-

For peer review only

Overview of Healthcare Regulation Map

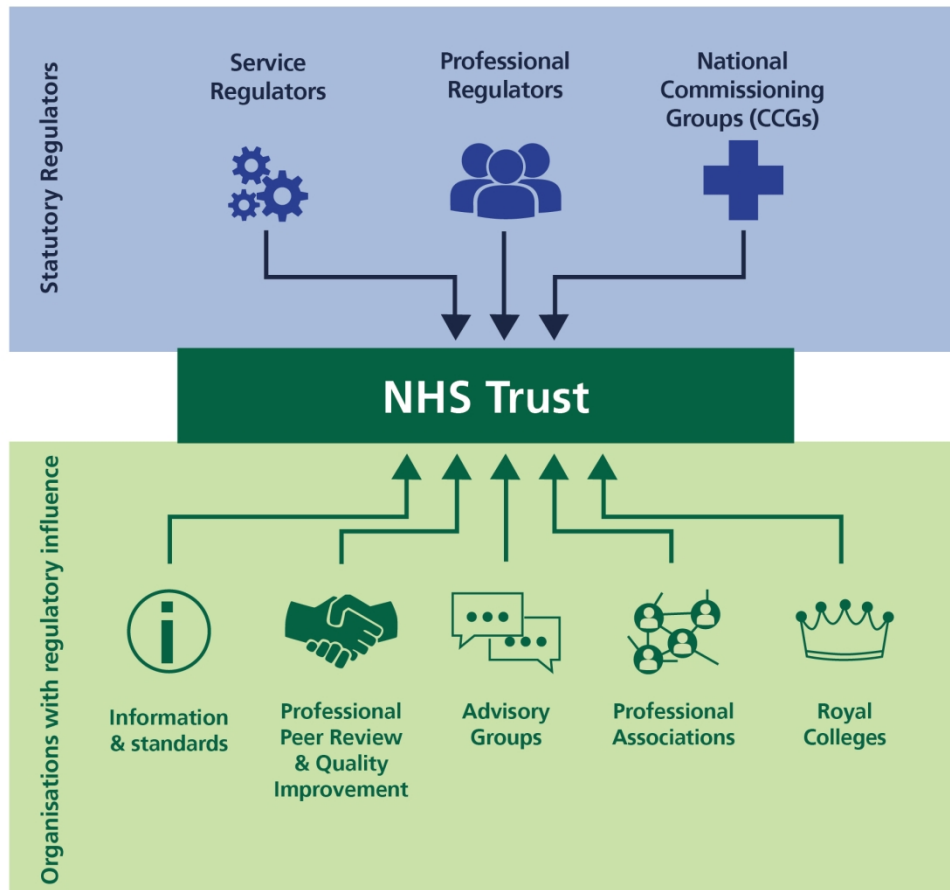

Overview of Health care Regulation Map

162x162mm (300 x 300 DPI)

## Regulatory activities and definitions

| Activities                                                          | Definitions                                                                                         |
|---------------------------------------------------------------------|-----------------------------------------------------------------------------------------------------|
| <b>Registration</b>                                                 | Registration of healthcare professionals to ensure compliance with legal requirements.              |
| <b>Accreditation</b>                                                | Accreditation, licensing or revalidation to maintain and assure professional skills                 |
| <b>Policy provider</b>                                              | Setting of formal rules and guidelines.                                                             |
| <b>Monitoring of services and professionals</b>                     | Systematic collection of information to assess and maintain standards of care                       |
| <b>Investigation</b>                                                | Formal examination of an incident.                                                                  |
| <b>Inspection</b>                                                   | Formal examination or visit to assess standards of care.                                            |
| <b>Imposition of sanctions</b>                                      | Penalties or fines for disobeying a law or rule.                                                    |
| <b>Quality improvement</b>                                          | Performance analysis and systematic attempt to improve it.                                          |
| <b>Analysis and sharing of data</b>                                 | Collection of data, analysis and potentially sharing with other regulatory organisation.            |
| <b>Advice and support for the public</b>                            | Publishing performance evaluations or other information on standards.                               |
| <b>Advice and support health care providers or other regulators</b> | Providing professional or legal advice to professionals and organisations.                          |
| <b>Representation</b>                                               | Representing professionals in the maintenance of standards.                                         |
| <b>Professional development</b>                                     | Programmes of education and training to equip professionals with knowledge, skills and competences. |
| <b>Research</b>                                                     | Systematic investigation of events and information relevant to maintaining standards                |

### Regulatory Activities and Definitions

175x199mm (300 x 300 DPI)

Regulators and Organisations with Regulatory Influence



Regulators and Organisations with Regulatory Influence

279x189mm (300 x 300 DPI)

1  
2  
3  
4  
5  
6  
7  
8  
9  
10  
11  
12  
13  
14  
15  
16  
17  
18  
19  
20  
21  
22  
23  
24  
25  
26  
27  
28  
29  
30  
31  
32  
33  
34  
35  
36  
37  
38  
39  
40  
41  
42  
43  
44  
45  
46  
47  
48  
49  
50  
51  
52  
53  
54  
55  
56  
57  
58  
59  
60

Regulatory functions and activities

|                                      |                | Standard setting | Registration | Accreditation | Policy provider | Monitoring | Investigation | Inspect | Sanctions | Quality Improvement | Data & feedback | Public advice and support | Healthcare education and support | Advocacy | Training | Research |   |
|--------------------------------------|----------------|------------------|--------------|---------------|-----------------|------------|---------------|---------|-----------|---------------------|-----------------|---------------------------|----------------------------------|----------|----------|----------|---|
| Regulators                           | Services       |                  |              |               |                 |            |               |         |           |                     |                 |                           |                                  |          |          |          |   |
|                                      | CQC            | •                | •            | •             | •               | •          | •             | •       | •         | •                   | •               | •                         | •                                |          |          |          |   |
|                                      | NHSI           |                  |              |               | •               | •          | •             | •       | •         | •                   | •               | •                         | •                                |          | •        |          |   |
|                                      | UKAS           | •                |              | •             |                 |            |               |         |           |                     |                 |                           |                                  |          |          |          |   |
|                                      | HFEA           |                  | •            | •             | •               | •          | •             | •       | •         |                     | •               | •                         | •                                |          |          | •        |   |
|                                      | HSE            | •                |              | •             | •               | •          | •             | •       | •         |                     |                 | •                         | •                                |          | •        | •        |   |
|                                      | EA             | •                |              |               | •               | •          | •             | •       | •         |                     |                 |                           |                                  |          |          |          |   |
|                                      | NHS Resolution |                  |              |               |                 |            |               |         |           |                     |                 | •                         | •                                | •        | •        |          |   |
|                                      | Coroners       |                  |              |               |                 |            | •             |         |           |                     |                 |                           |                                  |          |          |          | • |
|                                      | HTA            | •                |              | •             | •               |            |               | •       | •         | •                   |                 | •                         | •                                |          |          | •        | • |
|                                      | MHRA           | •                |              |               | •               |            |               | •       | •         | •                   | •               | •                         | •                                |          |          | •        | • |
|                                      | Professionals  |                  |              |               |                 |            |               |         |           |                     |                 |                           |                                  |          |          |          |   |
|                                      | GMC            | •                | •            | •             | •               |            |               | •       | •         | •                   |                 | •                         | •                                |          |          | •        | • |
|                                      | GDC            | •                | •            | •             | •               |            |               | •       | •         | •                   |                 | •                         | •                                |          |          | •        | • |
| GCC                                  | •              | •                | •            | •             |                 |            | •             | •       | •         |                     | •               | •                         |                                  |          | •        | •        |   |
| GOC                                  | •              | •                | •            | •             |                 |            | •             | •       | •         |                     | •               | •                         |                                  |          | •        | •        |   |
| GOsC                                 | •              | •                | •            | •             | •               |            | •             | •       | •         |                     | •               | •                         |                                  |          | •        | •        |   |
| GPhC                                 | •              | •                | •            | •             |                 |            | •             | •       | •         |                     | •               | •                         |                                  |          | •        | •        |   |
| HCPC                                 | •              | •                | •            | •             |                 |            | •             | •       | •         |                     | •               | •                         |                                  | •        | •        | •        |   |
| NMC                                  | •              | •                | •            | •             |                 |            | •             | •       | •         | •                   | •               | •                         |                                  |          | •        | •        |   |
| CCGs                                 | •              | •                | •            | •             | •               | •          | •             | •       | •         | •                   | •               | •                         |                                  |          | •        | •        |   |
| Organisations with regulatory effect |                |                  |              |               |                 |            |               |         |           |                     |                 |                           |                                  |          |          |          |   |
| Information & standards              | •              |                  |              | •             | •               | •          | •             | •       | •         | •                   | •               | •                         | •                                |          | •        | •        |   |
| Peer Review                          |                |                  |              |               |                 | •          | •             | •       | •         | •                   | •               | •                         | •                                |          | •        | •        |   |
| Advisory Groups                      |                |                  |              |               | •               |            | •             | •       | •         | •                   | •               | •                         | •                                |          | •        | •        |   |
| Royal Colleges                       | •              | •                | •            | •             |                 |            | •             | •       | •         | •                   | •               | •                         |                                  | •        | •        | •        |   |
| Professional Associations            |                | •                | •            |               |                 |            |               |         |           |                     |                 |                           |                                  | •        | •        | •        |   |

Regulatory Functions and Activities

250x209mm (300 x 300 DPI)

Full list of Regulators and Influencing Organisations

|                                                               |                                                                                                                                                                                                                                                                                                                                                                                                                                                                                                                                                                                                                                                                                                                                                                                                                                                                                                                                                                                                                                                                                                                                                                                                                                                                                                                                                                                                                                                                                                                                                                                                                                                                                                                                                                                                                                                                                                                                                                                                                                 |
|---------------------------------------------------------------|---------------------------------------------------------------------------------------------------------------------------------------------------------------------------------------------------------------------------------------------------------------------------------------------------------------------------------------------------------------------------------------------------------------------------------------------------------------------------------------------------------------------------------------------------------------------------------------------------------------------------------------------------------------------------------------------------------------------------------------------------------------------------------------------------------------------------------------------------------------------------------------------------------------------------------------------------------------------------------------------------------------------------------------------------------------------------------------------------------------------------------------------------------------------------------------------------------------------------------------------------------------------------------------------------------------------------------------------------------------------------------------------------------------------------------------------------------------------------------------------------------------------------------------------------------------------------------------------------------------------------------------------------------------------------------------------------------------------------------------------------------------------------------------------------------------------------------------------------------------------------------------------------------------------------------------------------------------------------------------------------------------------------------|
| <b>Regulators</b>                                             |                                                                                                                                                                                                                                                                                                                                                                                                                                                                                                                                                                                                                                                                                                                                                                                                                                                                                                                                                                                                                                                                                                                                                                                                                                                                                                                                                                                                                                                                                                                                                                                                                                                                                                                                                                                                                                                                                                                                                                                                                                 |
| <b>Services Regulators</b><br>10                              | Care Quality Commission (CQC), NHS Improvement , United Kingdom Accreditation Service (UKAS), Human Fertilisation and Embryology Authority, Health and Safety Executive (HSE), Environment Agency (EA), NHS Resolution, The Coroners' Society of England and Wales, Human Tissue Authority (HTA), Medicines and Healthcare products Regulatory Agency (MHRA)                                                                                                                                                                                                                                                                                                                                                                                                                                                                                                                                                                                                                                                                                                                                                                                                                                                                                                                                                                                                                                                                                                                                                                                                                                                                                                                                                                                                                                                                                                                                                                                                                                                                    |
| <b>Professional Regulators</b><br>8                           | General Medical Council (GMC), General Dental Council (GDC), General Chiropractic Council (GCC), General Optical Council (GOC), General Osteopathic Council (GOSc), General Pharmaceutical Council (GPhC), Health and Care Professions Council (HCPC), Nursing and Midwifery Council (NMC)                                                                                                                                                                                                                                                                                                                                                                                                                                                                                                                                                                                                                                                                                                                                                                                                                                                                                                                                                                                                                                                                                                                                                                                                                                                                                                                                                                                                                                                                                                                                                                                                                                                                                                                                      |
| <b>Organisations with regulatory influence</b>                |                                                                                                                                                                                                                                                                                                                                                                                                                                                                                                                                                                                                                                                                                                                                                                                                                                                                                                                                                                                                                                                                                                                                                                                                                                                                                                                                                                                                                                                                                                                                                                                                                                                                                                                                                                                                                                                                                                                                                                                                                                 |
| <b>Information and standards</b><br>11                        | National Institute for Health and Care Excellence (NICE), UK National Standards Body - British Standards Institution (BSI), International Organization for Standardization (ISO), Office for Standards in Education (OFSTED), Ionising Radiation (Medical Exposure) (IR(ME)R) , Health Education England (HEE), NHS Digital, National Joint registry (NJR), National Confidential Inquiry into Patient Outcome and Death (NCEPOD), British Cardiovascular Society (BCS), Institute of Physics and Engineering in Medicine (IPEM)                                                                                                                                                                                                                                                                                                                                                                                                                                                                                                                                                                                                                                                                                                                                                                                                                                                                                                                                                                                                                                                                                                                                                                                                                                                                                                                                                                                                                                                                                                |
| <b>Professional Peer Review and Quality Improvement</b><br>13 | Healthcare Safety Investigation Branch, National Cancer peer review and Quality Improvement Network System, National Diabetes peer review (DQuINS)/ Diabetes Quality Improvement Network System, National Stroke Peer Review (NSPR)/ Stroke Quality Improvement Network System, National Trauma Peer Review (NTPR)/ Trauma Quality Improvement Network System, National Social Care Research Ethics Committee, United Kingdom Ethics Committee Authority (UKECA), UK Forum on Haemoglobin Disorders, Healthcare intelligence and quality improvement services (CHK5), College Centre for Quality Improvement (CCQI), NHS Regional Quality Assurance Service, Improving Quality in Physiological Services programme (IQIPS), Healthcare Quality Improvement Partnership (HQIP)                                                                                                                                                                                                                                                                                                                                                                                                                                                                                                                                                                                                                                                                                                                                                                                                                                                                                                                                                                                                                                                                                                                                                                                                                                                   |
| <b>Advisory Groups</b><br>21                                  | Healthwatch England, Confidentiality Advisory Group (CAG),The National Young People's Mental health Advisory Group, Healthcare Science Advisory Group, Public Health Advisory Committees , Patient Advisory Forum (PAF), , Nursing and Midwifery Advisory Group (HEEAG) , Allied Health Professionals (AHP) advisory group , Dental advisory group, Medical Advisory Group, Pharmacy Advisory Group, Health Services Advisory Group (HSAG), Advisory Group on Ionising Radiation (AGIR), Health Premium Incentive Advisory Group (HPIAG), INVOLVE public participation group , Administration of Radioactive Substances Advisory Committee, Joint Advisory Group of Endoscopy (JAG), Advisory Group on contraception (AGC), Gene Therapy Advisory Committee (GTAC), Clinical Pharmacology Special Interest Group, Committee on Mutagenicity of Chemicals in Food, Consumer Products and the Environment                                                                                                                                                                                                                                                                                                                                                                                                                                                                                                                                                                                                                                                                                                                                                                                                                                                                                                                                                                                                                                                                                                                         |
| <b>Royal Colleges</b><br>19                                   | Royal College of Physicians of London, Royal College of Psychiatrists, Faculty of Dental Surgery, Faculty of Public Health, Royal College of General Practitioners, Royal College of Anaesthetists, Royal College of Obstetricians and Gynaecologists, Royal College of Radiologists, Faculty of Occupational Medicine, Royal College of Surgeons of England, Royal College of Emergency Medicine, Royal College of Ophthalmologists, Royal College of Pathologists, Royal College of Paediatrics and Child Health, Faculty of Pharmaceutical Medicine, Faculty of Sport and Exercise Medicine (UK), Faculty of Intensive Care Medicine, Faculty of Sexual and Reproductive Health, Faculty of Forensic and Legal Medicine                                                                                                                                                                                                                                                                                                                                                                                                                                                                                                                                                                                                                                                                                                                                                                                                                                                                                                                                                                                                                                                                                                                                                                                                                                                                                                      |
| <b>Professional Associations</b><br>45                        | British Psychological Society (BPS), Chartered Society of Physiotherapy, College of Paramedics, College of Optometrists, Professional Standards Authority for Health and Social Care, British Society for Haematology , British Geriatrics Society, Royal Society of Medicine British Institute of Radiology (BIR), British Society of Echocardiography (BSE), Joint Accreditation Committee (JACIE), Institute of Biomedical Science (IBMS), Association for Paediatric Palliative Medicine, Association of Paediatric Emergency Medicine, British Academy of Childhood Disability, British Association for Adoption and Fostering (BAAF), British Association for Child and Adolescent Public Health (BACAPH), British Association for Paediatric Nephrology, British Association of Community Child Health (BACCH), British Association of General Paediatrics (BAGP), British Association of Paediatricians in Audiology (BAPA), British Association of Paediatric Surgeons (BAPS), British Association of Perinatal Medicine (BAPM), British Congenital Cardiac Association (BCCA), British Inherited Metabolic Disease Group (BIMDG), British Paediatric Allergy Immunology and Infection Group (BPAIG), British Paediatric and Adolescent Bone Group (BPABG), British Paediatric Neurology Association (BPNA), British and Irish Paediatric Pathology Association (BRIPPA), British Paediatric Respiratory Society (BPRS), British Society for Paediatric and Adolescent Rheumatology (BSPAR), British Society for Paediatric Dermatology (BSPD), British Society for Paediatric Endocrinology and Diabetes (BSPED), British Society for Paediatric Gastroenterology, Hepatology and Nutrition (BSPGHAN), Paediatric Mental Health Association (PMHA), College of Medicine , Paediatric Oncology Shared Care Unit (POSCU), Paediatric Intensive Care Society (PICS), Surgical Review Corporation (SRC), Clinical Genetics Society, Children's Cancer and Leukaemia Group (CCLG), UK Psychological Trauma Society (UKPTS) |

Full List of Regulators and Influencing Organisations

209x297mm (300 x 300 DPI)
